# Supplementary material for: Efficient Buchwald–Hartwig and nitrene-mediated five-membered ring closure approaches to the total synthesis of quindoline. Unexpected direct conversion of a nitro group into a phosphazene
Source: Royal Society of Chemistry journal article supplement (doi:10.1039/d3ra02468g), 2023-01-01
Supplement: d3ra02468g1.pdf [file d3ra02468g1.pdf]

## Supplementary Information

### **Efficient Buchwald-Hartwig and nitrene-mediated five-membered ring closure approaches to the total synthesis of quindoline. Unexpected direct conversion of a nitro group into a phosphazene**

Elida N. Thobokholt,<sup>a</sup> Sebastián O. Simonetti,<sup>a</sup> Teodoro S. Kaufman,<sup>a</sup> Enrique L. Larghi<sup>a,\*</sup> and Andrea B. J. Bracca<sup>a,\*</sup>

<sup>a</sup>Instituto de Química Rosario (IQUIR, CONICET-UNR), and Facultad de Ciencias Bioquímicas y Farmacéuticas, Universidad Nacional de Rosario, Suipacha 531, S2002LRK Rosario, República Argentina.

E-mail: bracca@iquir-conicet.gov.ar (ABJB); larghi@iquir-conicet.gov.ar (ELL)

## TABLE OF CONTENTS

| Description                                                                                       | Page No |
|---------------------------------------------------------------------------------------------------|---------|
| <b>Figure S1.</b> $^1\text{H}$ NMR (300 MHz) spectrum of compound <b>15</b> in $\text{CDCl}_3$    | 3       |
| <b>Figure S2.</b> $^{13}\text{C}$ NMR (75 MHz) spectrum of compound <b>15</b> in $\text{CDCl}_3$  | 3       |
| <b>Figure S3.</b> $^1\text{H}$ NMR (300 MHz) spectrum of compound <b>18</b> in $\text{CDCl}_3$    | 4       |
| <b>Figure S4.</b> $^{13}\text{C}$ NMR (75 MHz) spectrum of compound <b>18</b> in $\text{CDCl}_3$  | 4       |
| <b>Figure S5.</b> $^1\text{H}$ NMR (300 MHz) spectrum of compound <b>19</b> in $\text{CDCl}_3$    | 5       |
| <b>Figure S6.</b> $^{13}\text{C}$ NMR (75 MHz) spectrum of compound <b>19</b> in $\text{CDCl}_3$  | 5       |
| <b>Figure S7.</b> $^1\text{H}$ NMR (300 MHz) spectrum of compound <b>20</b> in $\text{CDCl}_3$    | 6       |
| <b>Figure S8.</b> $^{13}\text{C}$ NMR (75 MHz) spectrum of compound <b>20</b> in $\text{CDCl}_3$  | 6       |
| <b>Figure S9.</b> $^1\text{H}$ NMR (300 MHz) spectrum of compound <b>21</b> in $\text{CDCl}_3$    | 7       |
| <b>Figure S10.</b> $^{13}\text{C}$ NMR (75 MHz) spectrum of compound <b>21</b> in $\text{CDCl}_3$ | 7       |
| <b>Figure S11.</b> $^1\text{H}$ NMR (300 MHz) spectrum of compound <b>1</b> in $\text{CDCl}_3$    | 8       |
| <b>Figure S12.</b> $^{13}\text{C}$ NMR (75 MHz) spectrum of compound <b>1</b> in $\text{CDCl}_3$  | 8       |
| <b>Figure S13.</b> HSQC spectrum of compound <b>1</b> in $\text{CDCl}_3$                          | 9       |
| <b>Figure S14.</b> HMBC spectrum of compound <b>1</b> in $\text{CDCl}_3$                          | 9       |
| <b>Figure S15.</b> COSY spectrum of compound <b>1</b> in $\text{CDCl}_3$                          | 10      |
| <b>Figure S16.</b> $^1\text{H}$ spectrum (300 MHz) of compound <b>25</b> in $\text{CDCl}_3$       | 11      |
| <b>Figure S17.</b> $^{13}\text{C}$ spectrum (75 MHz) of compound <b>25</b> in $\text{CDCl}_3$     | 11      |
| <b>Figure S18.</b> HSQC spectrum of compound <b>25</b> in $\text{CDCl}_3$                         | 12      |
| <b>Figure S19.</b> HMBC spectrum of compound <b>25</b> in $\text{CDCl}_3$                         | 12      |
| <b>Figure S20.</b> COSY spectrum of compound <b>25</b> in $\text{CDCl}_3$                         | 13      |
| <b>Figure S21.</b> $^1\text{H}$ spectrum (300 MHz) of compound <b>26</b> in $\text{CDCl}_3$       | 14      |
| <b>Figure S22.</b> $^{13}\text{C}$ NMR (75 MHz) spectrum of compound <b>26</b> in $\text{CDCl}_3$ | 14      |
| <b>Figure S23.</b> $^1\text{H}$ NMR (300MHz) spectrum of compound <b>27</b> in $\text{CDCl}_3$    | 15      |
| <b>Figure S24.</b> $^{13}\text{C}$ NMR (75 MHz) spectrum of compound <b>27</b> in $\text{CDCl}_3$ | 15      |
| <b>Figure S25.</b> HSQC spectrum of compound <b>27</b> in $\text{CDCl}_3$                         | 16      |
| <b>Figure S26.</b> HMBC spectrum of compound <b>27</b> in $\text{CDCl}_3$                         | 16      |
| <b>Figure S27.</b> COSY spectrum of compound <b>27</b> in $\text{CDCl}_3$                         | 17      |
| <b>Figure S28.</b> $^{31}\text{P}$ spectrum (188 MHz) of compound <b>27</b> in $\text{CDCl}_3$    | 17      |
| <b>Cartesian Coordinates</b>                                                                      | 18      |

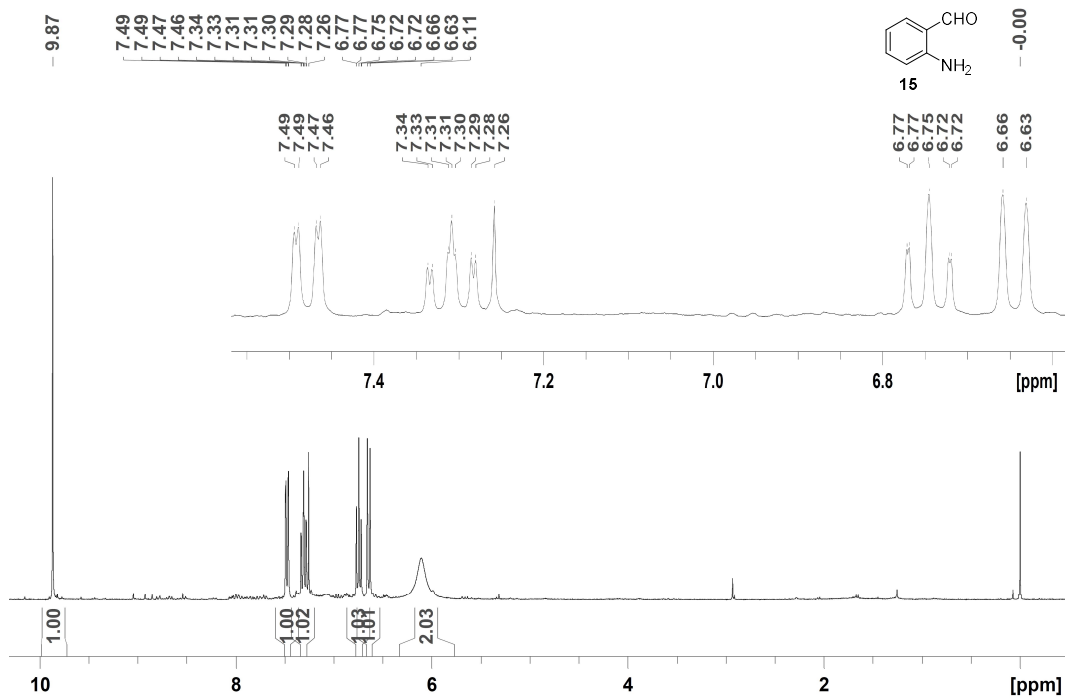

Figure S1. <sup>1</sup>H NMR (300 MHz) spectrum of compound 15 in CDCl<sub>3</sub>.

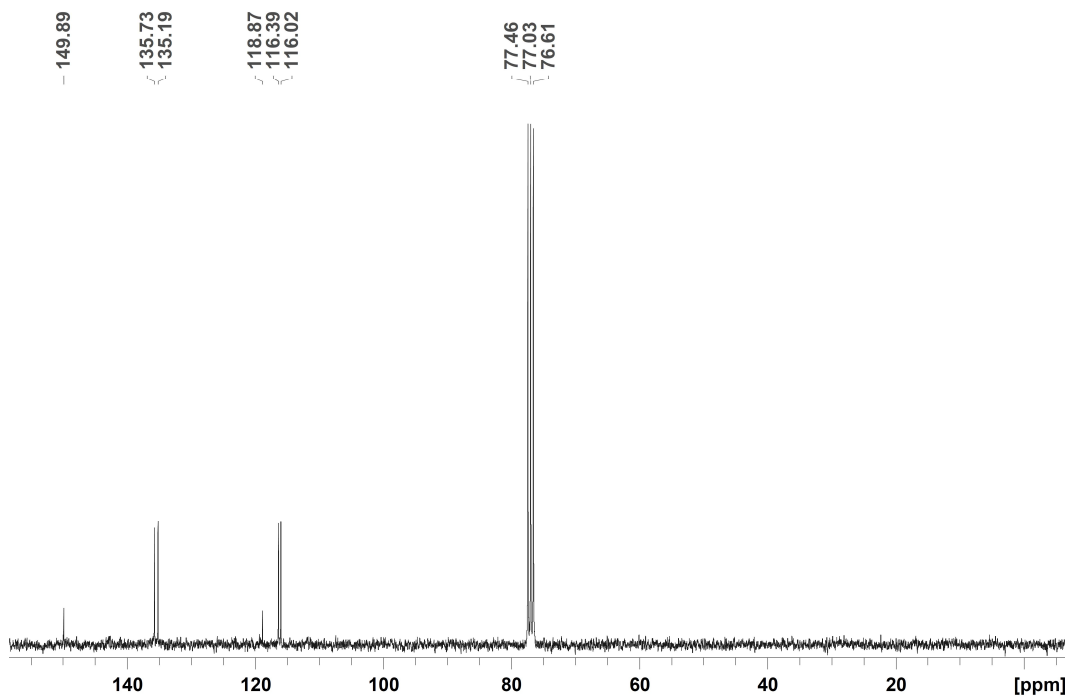

Figure S2. <sup>13</sup>C NMR (75 MHz) spectrum of compound 15 in CDCl<sub>3</sub>.

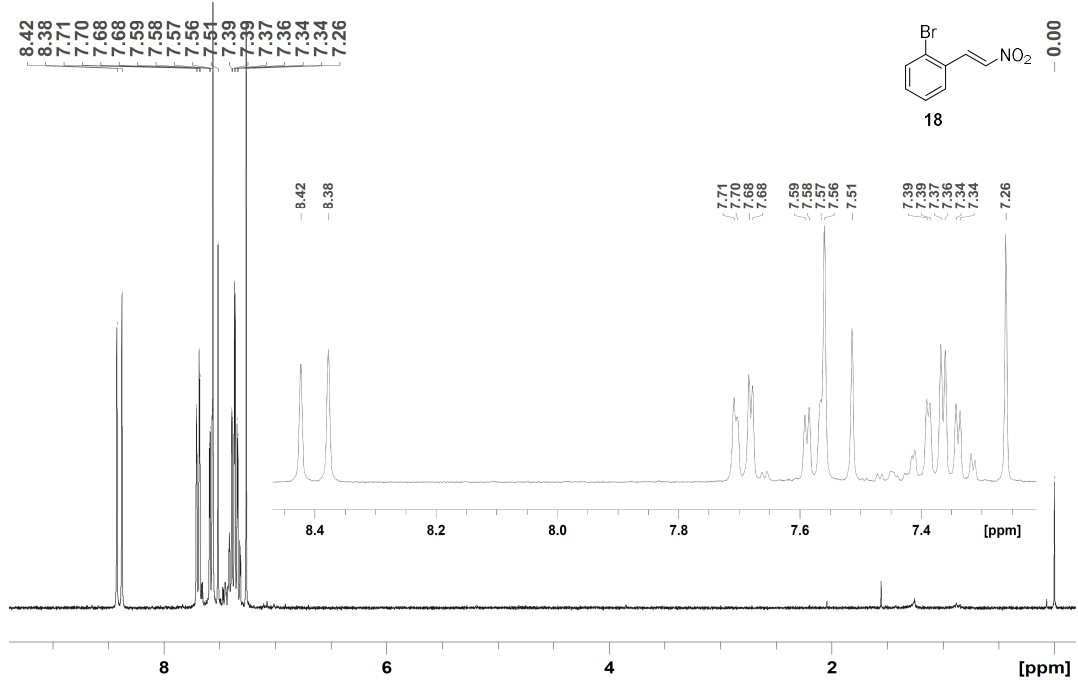

Figure S3. <sup>1</sup>H NMR (300 MHz) spectrum of compound **18** in CDCl<sub>3</sub>.

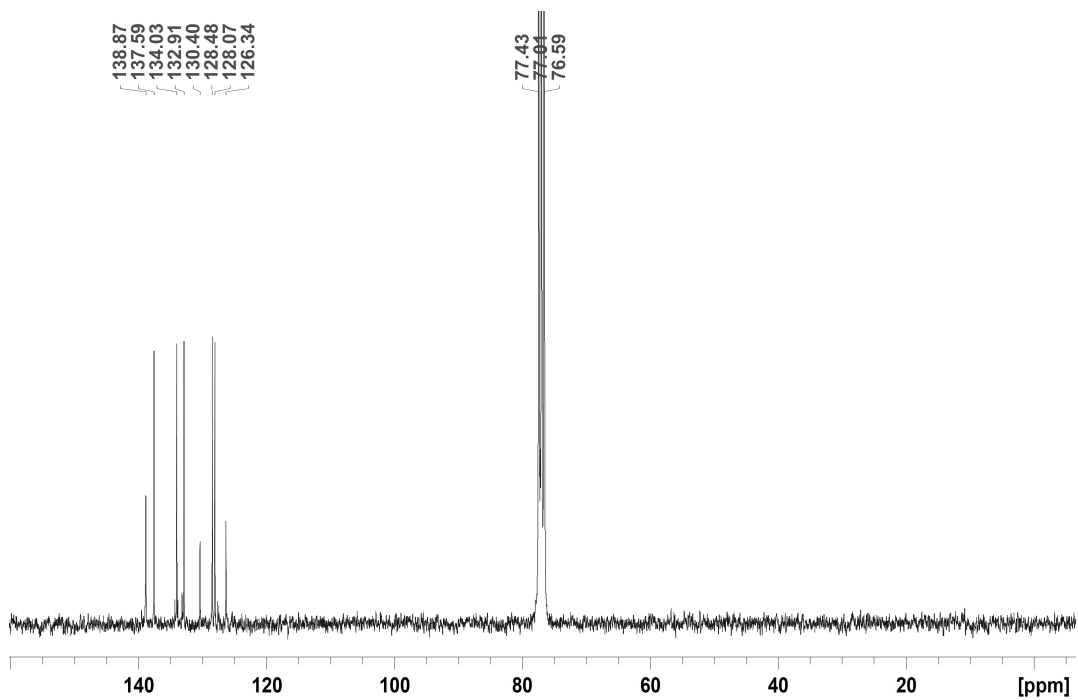

Figure S4. <sup>13</sup>C NMR (75 MHz) spectrum of compound **18** in CDCl<sub>3</sub>.

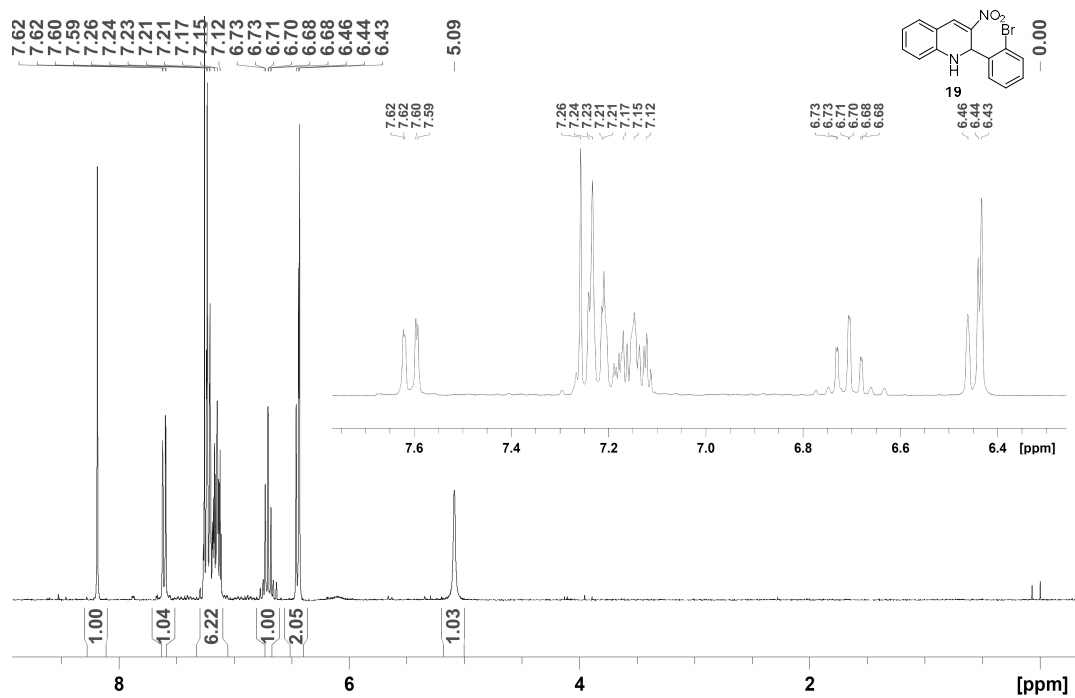

**Figure S5.** <sup>1</sup>H NMR (300 MHz) spectrum of compound **19** in CDCl<sub>3</sub>.

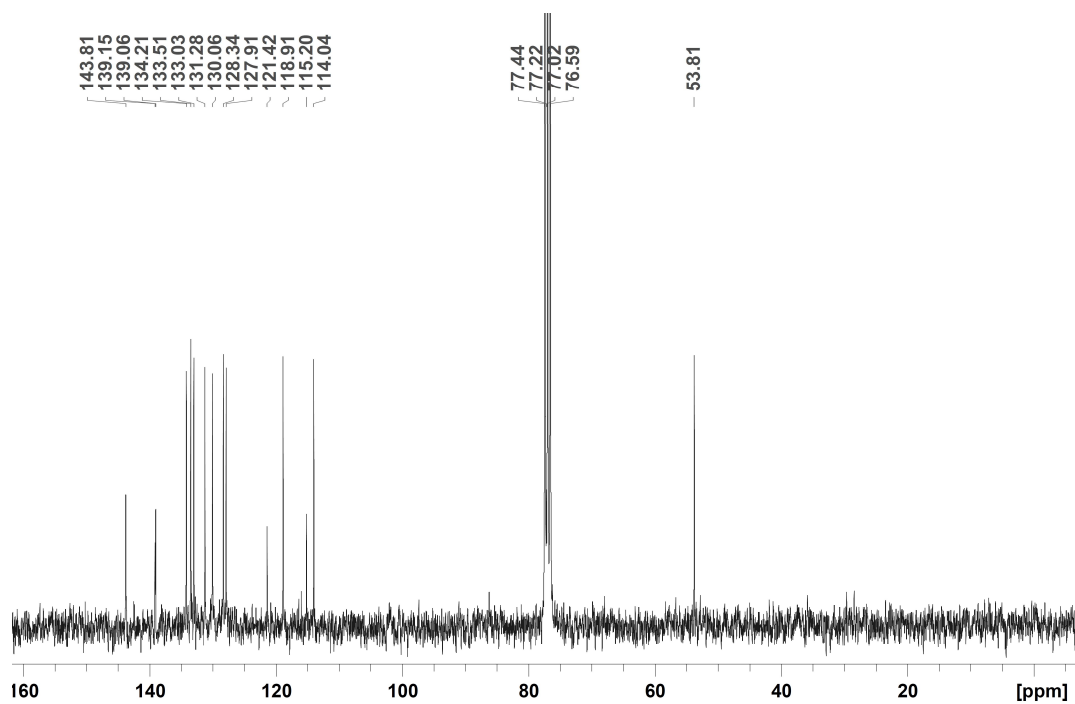

**Figure S6.** <sup>13</sup>C NMR (75 MHz) spectrum of compound **19** in CDCl<sub>3</sub>.

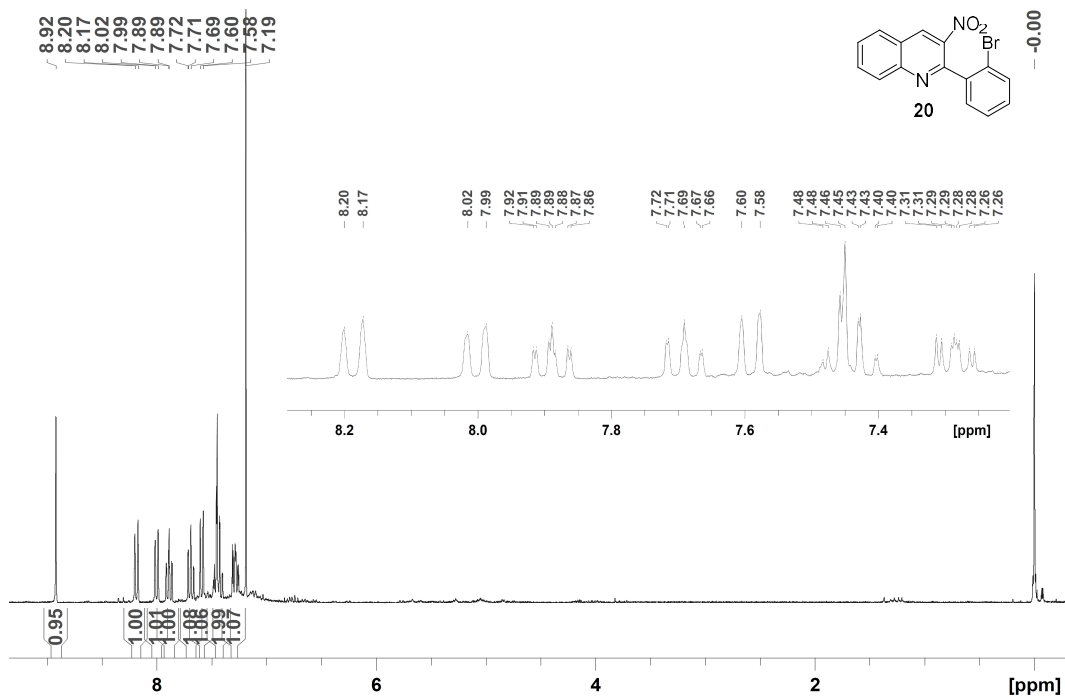

**Figure S7.**  $^1\text{H}$  NMR (300 MHz) spectrum of compound **20** in  $\text{CDCl}_3$ .

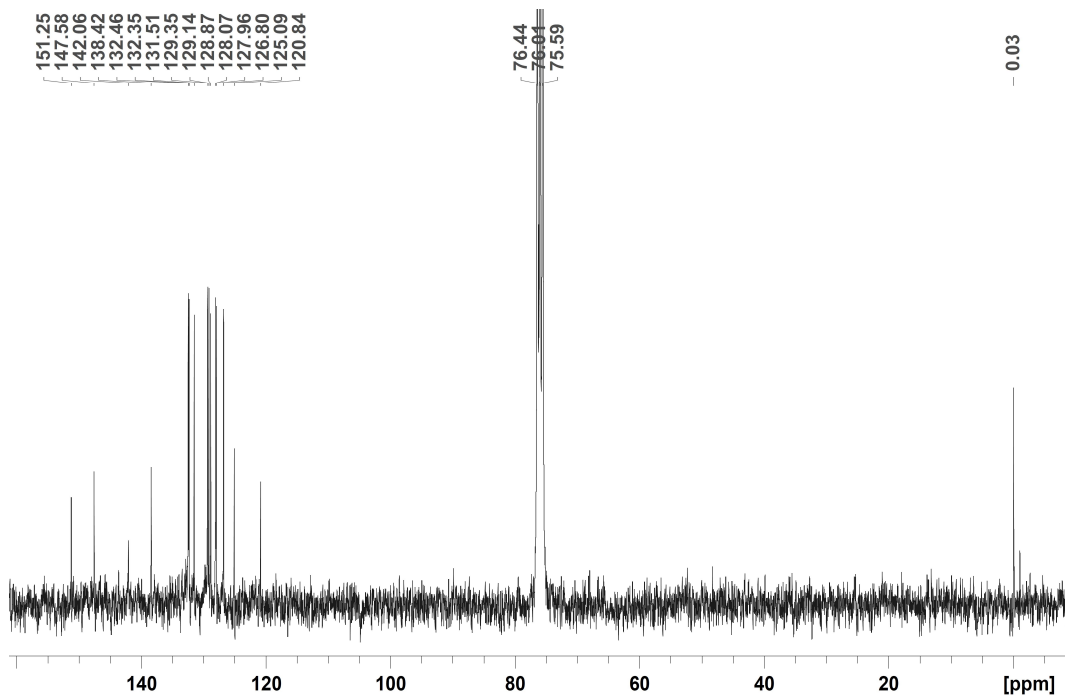

**Figure S8.**  $^{13}\text{C}$  NMR (75 MHz) spectrum of compound **20** in  $\text{CDCl}_3$ .

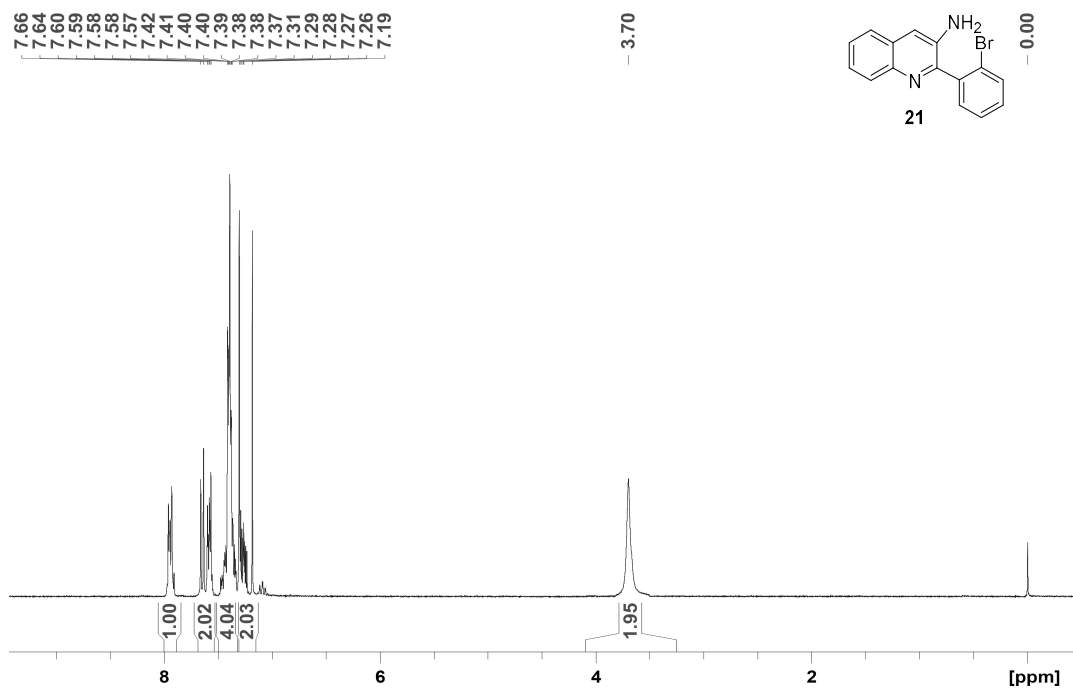

**Figure S9.**  $^1\text{H}$  NMR (300 MHz) spectrum of compound **21** in  $\text{CDCl}_3$ .

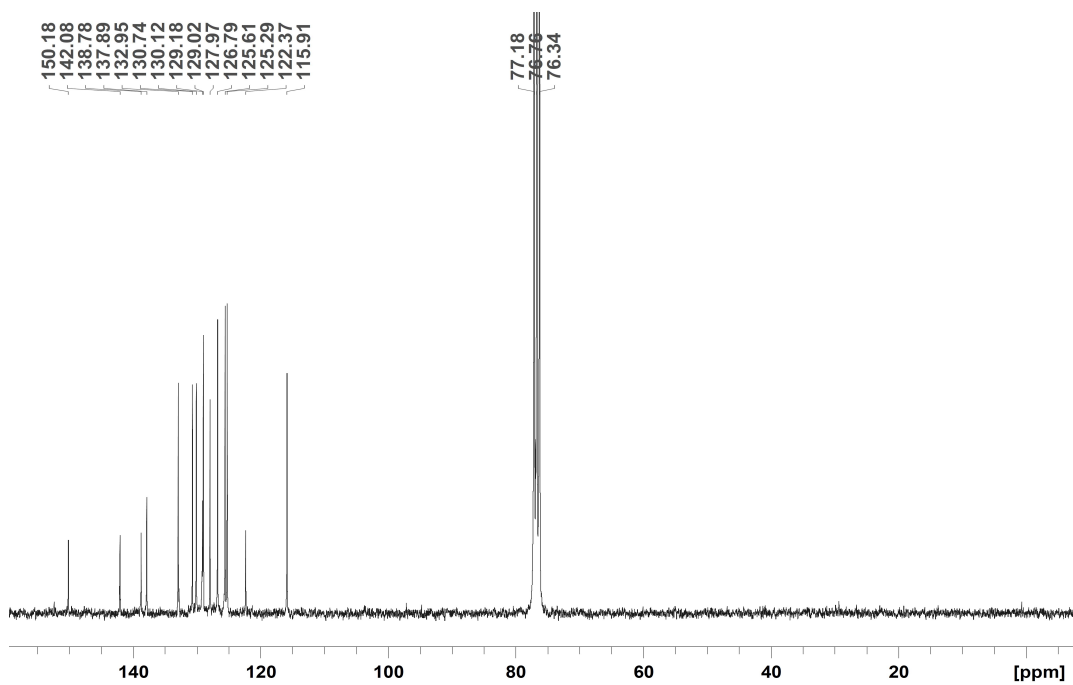

**Figure S10.**  $^{13}\text{C}$  NMR (75 MHz) spectrum of compound **21** in  $\text{CDCl}_3$ .

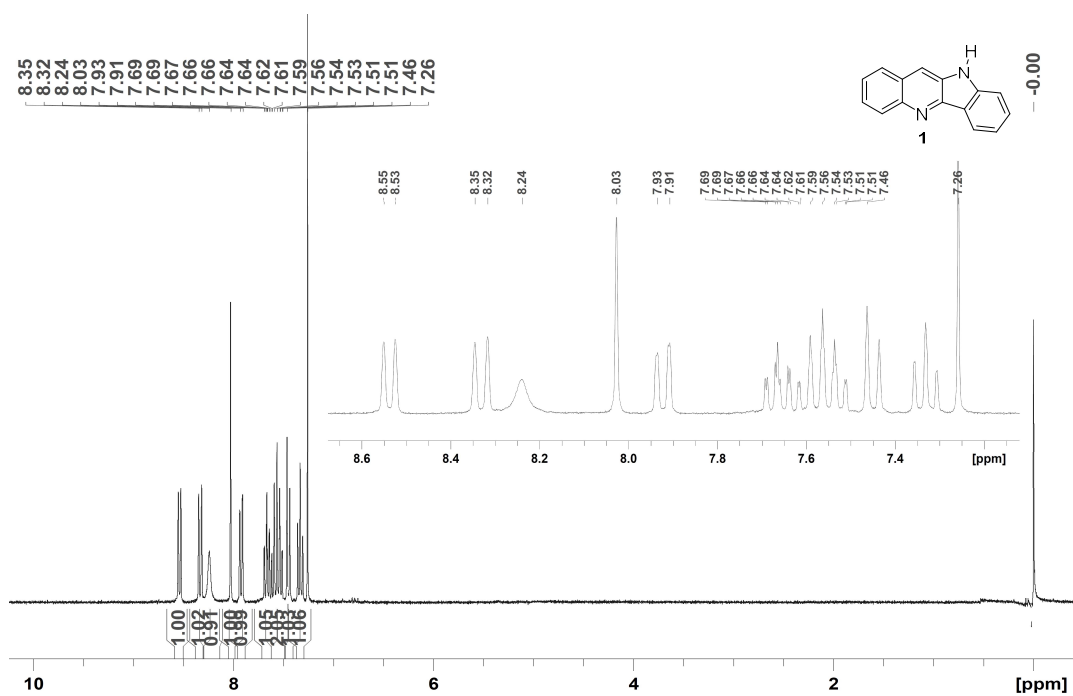

Figure S11.  $^1\text{H}$  NMR (300 MHz) spectrum of compound **1** in  $\text{CDCl}_3$ .

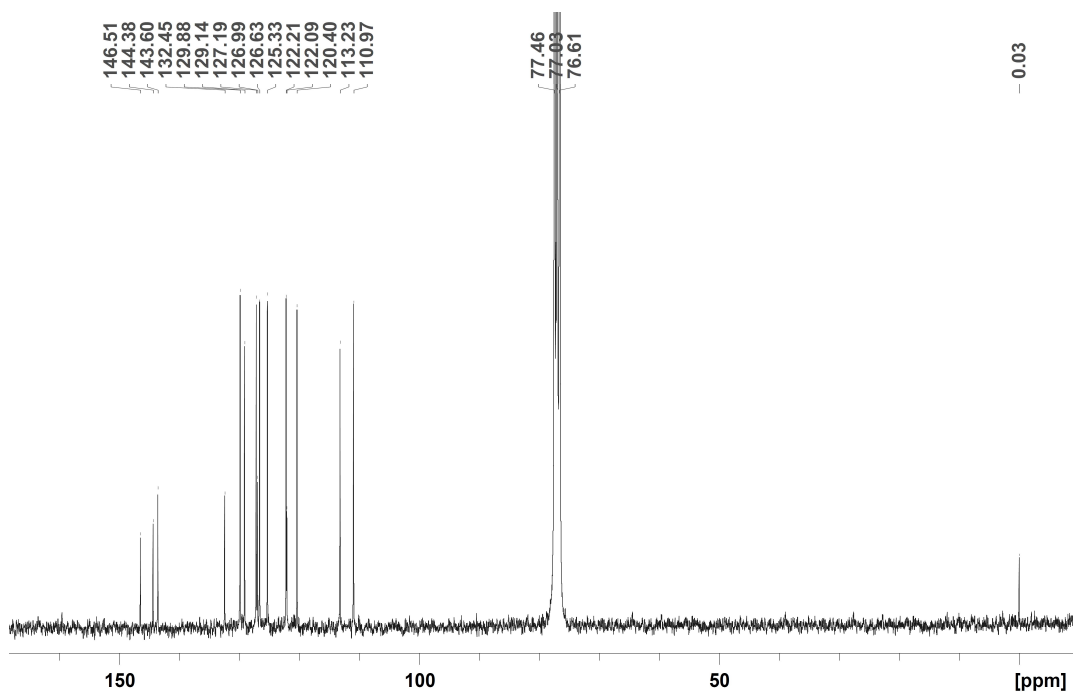

Figure S12.  $^{13}\text{C}$  NMR (75 MHz) spectrum of compound **1** in  $\text{CDCl}_3$ .



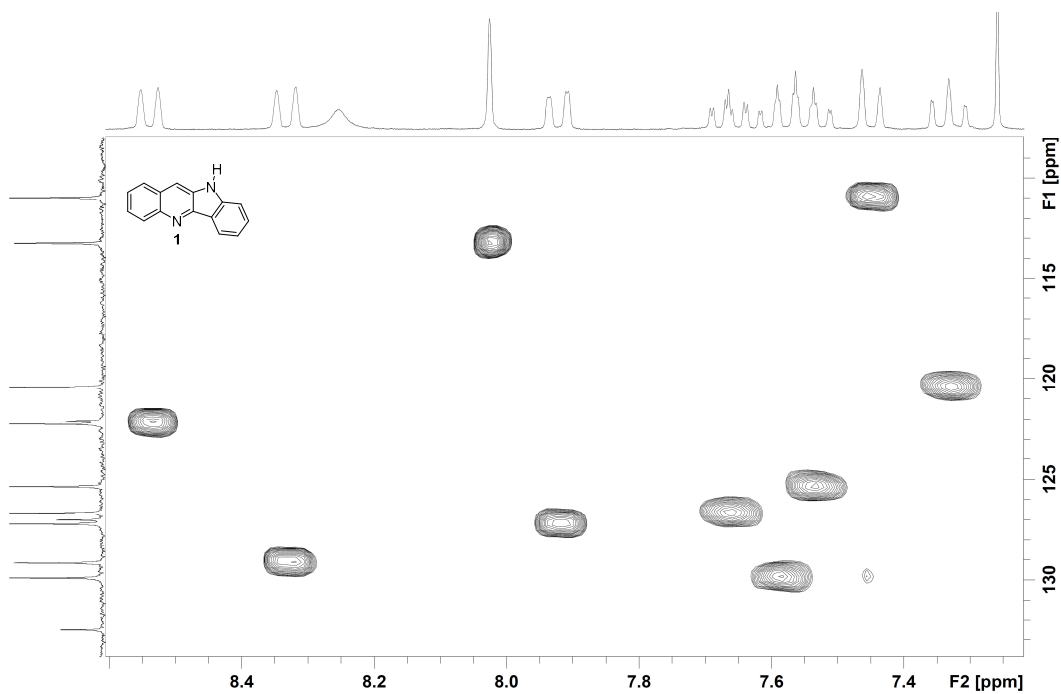

Figure S13. HSQC spectrum of compound **1** in CDCl<sub>3</sub>.

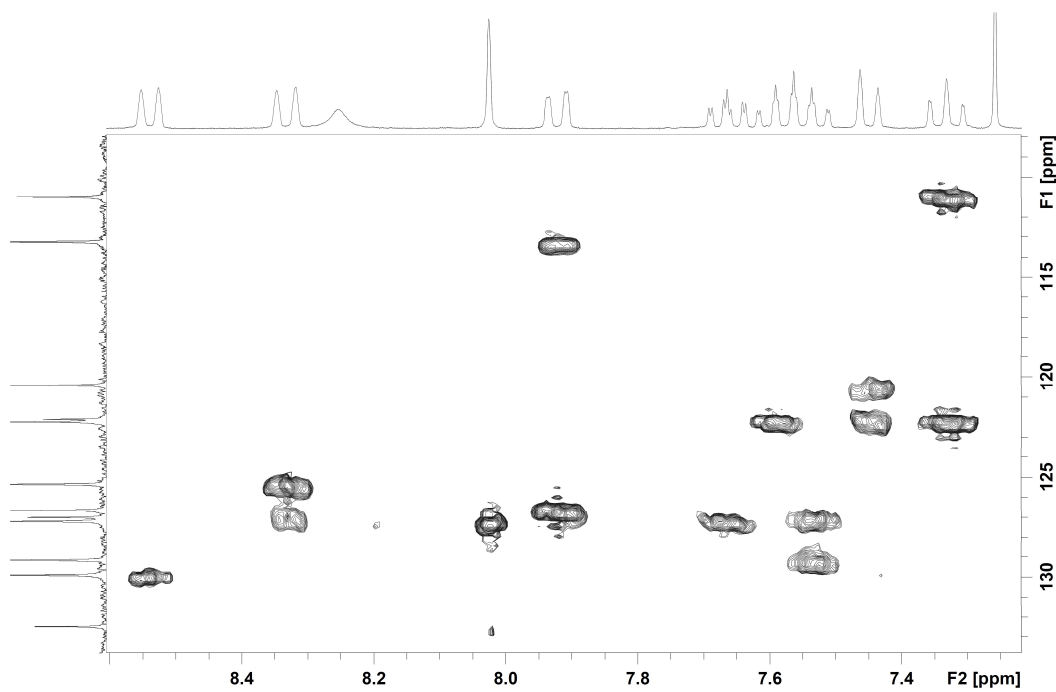

Figure S14. HMBC spectrum of compound **1** in CDCl<sub>3</sub>.

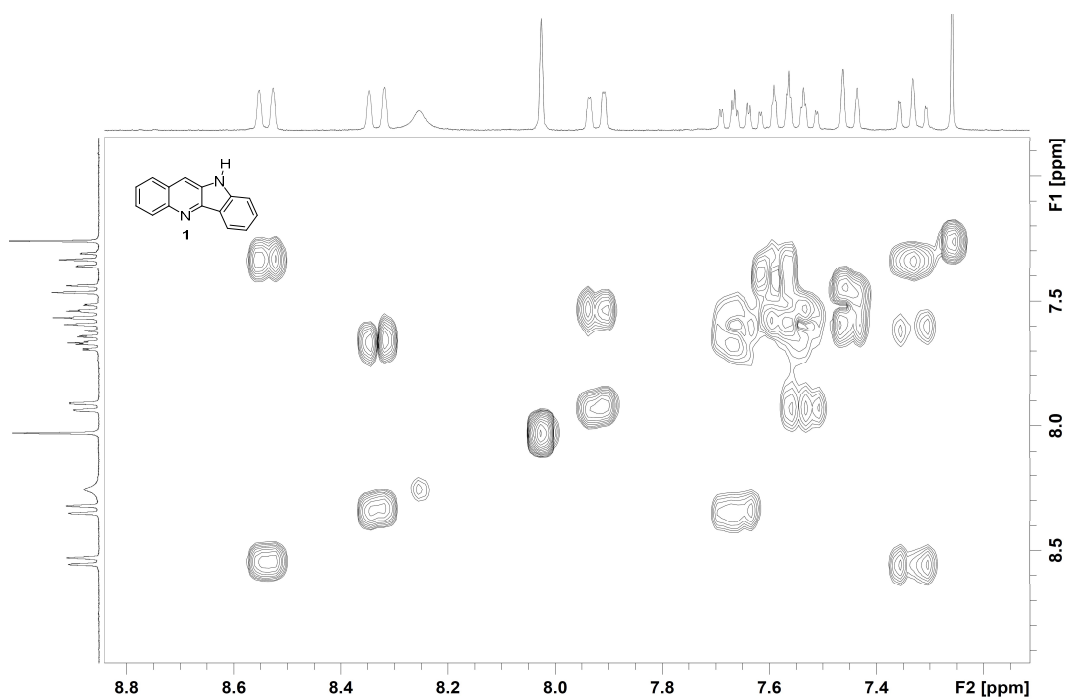

**Figure S15.** COSY spectrum of compound **1** in CDCl<sub>3</sub>.

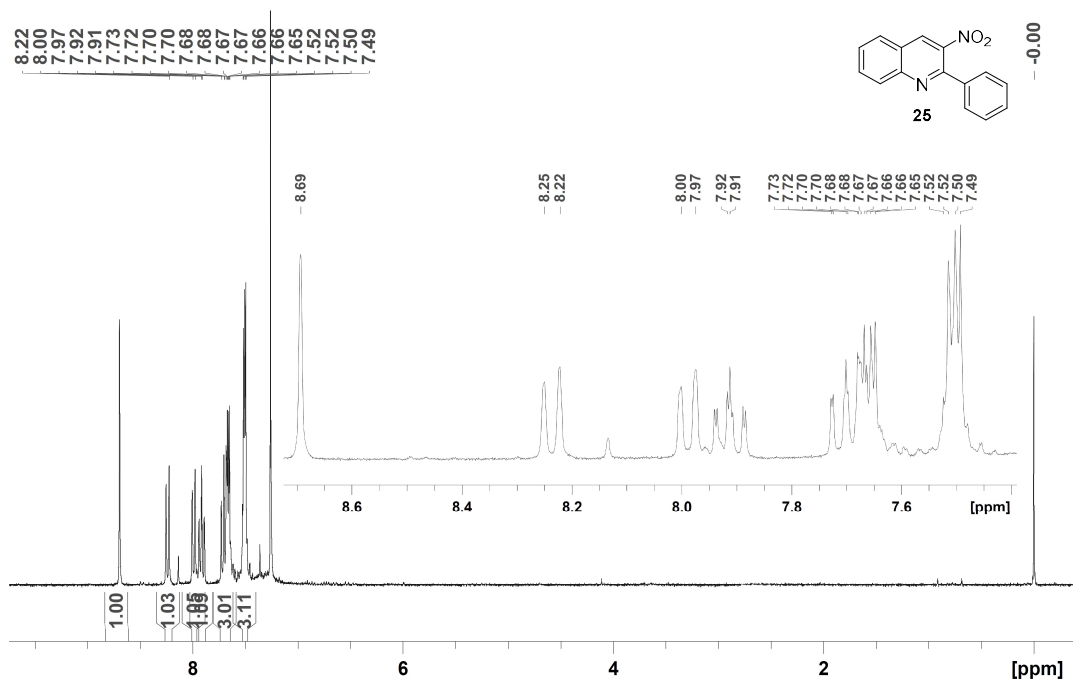

Figure S16. <sup>1</sup>H spectrum of compound 25 in CDCl<sub>3</sub>.

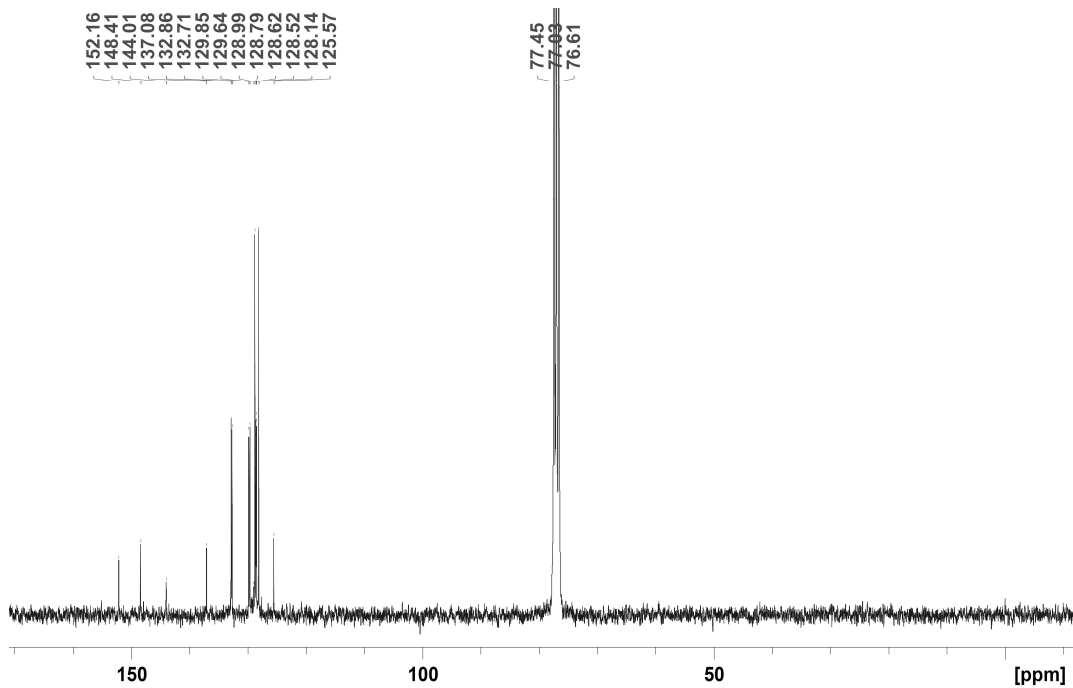

Figure S17. <sup>13</sup>C spectrum of compound 25 in CDCl<sub>3</sub>.

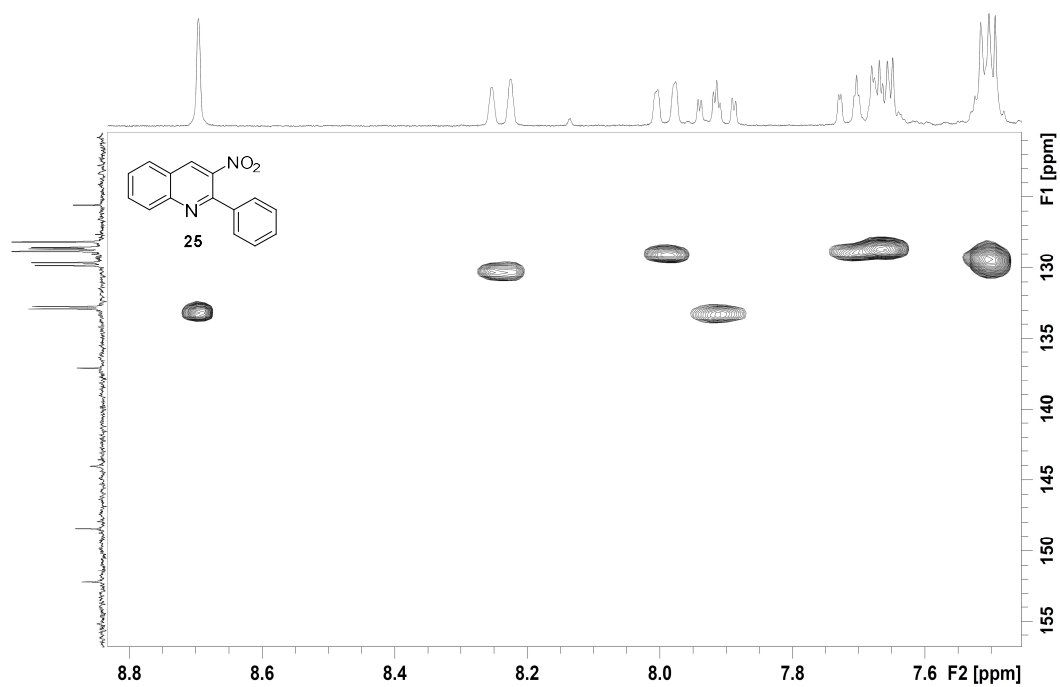

Figure S18. HSQC spectrum of compound 25 in CDCl<sub>3</sub>.

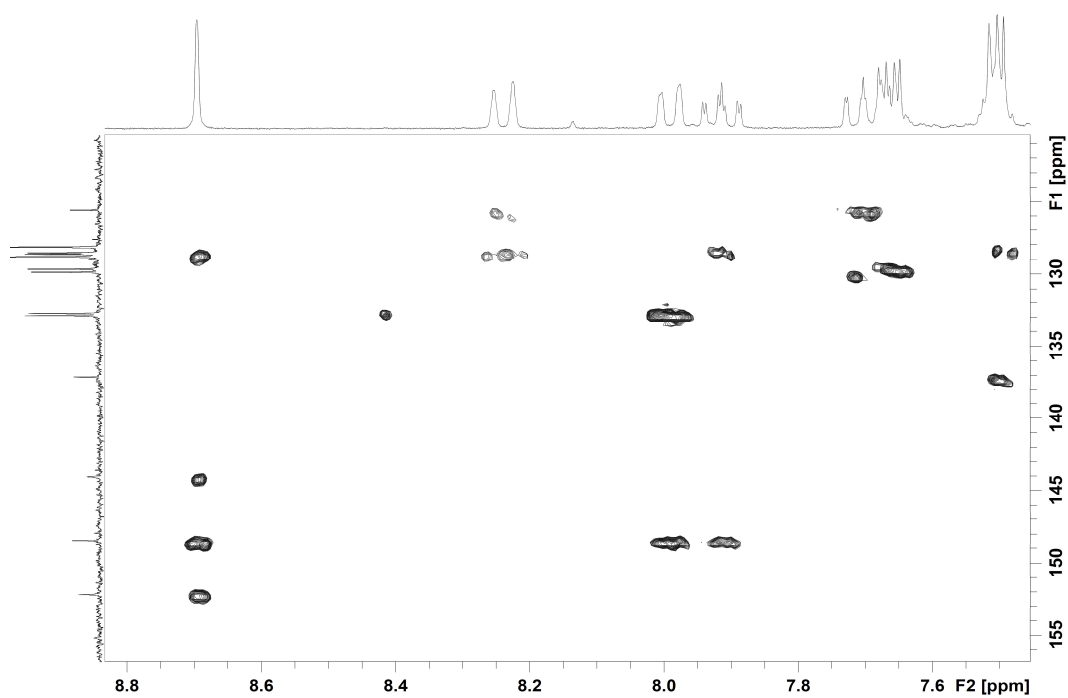

Figure S19. HMBC spectrum of compound 25 in CDCl<sub>3</sub>.

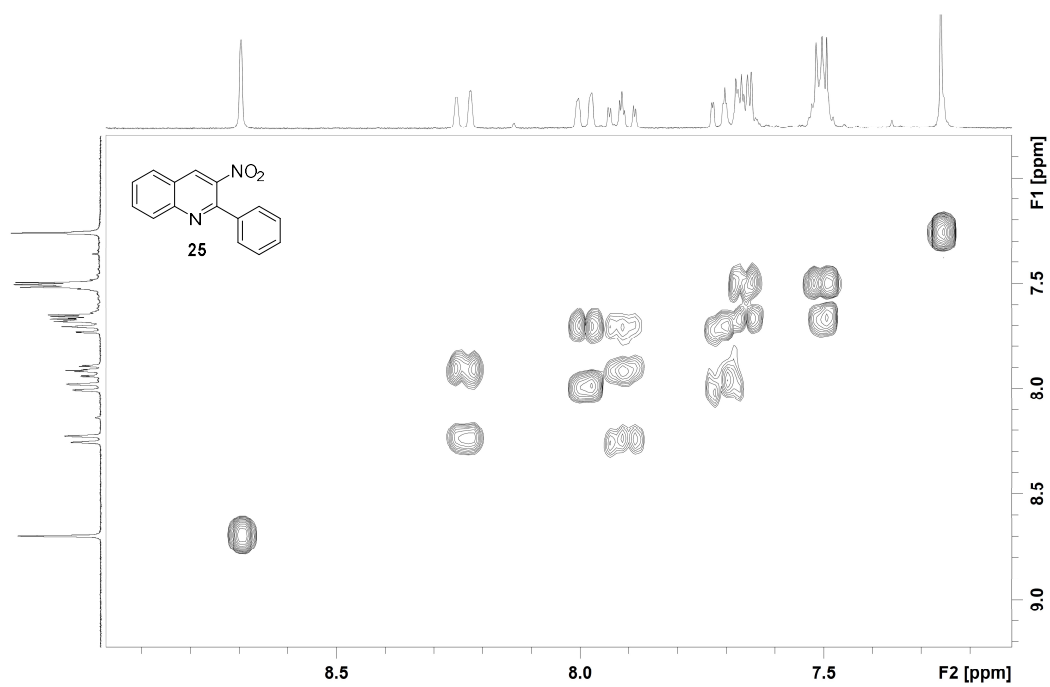

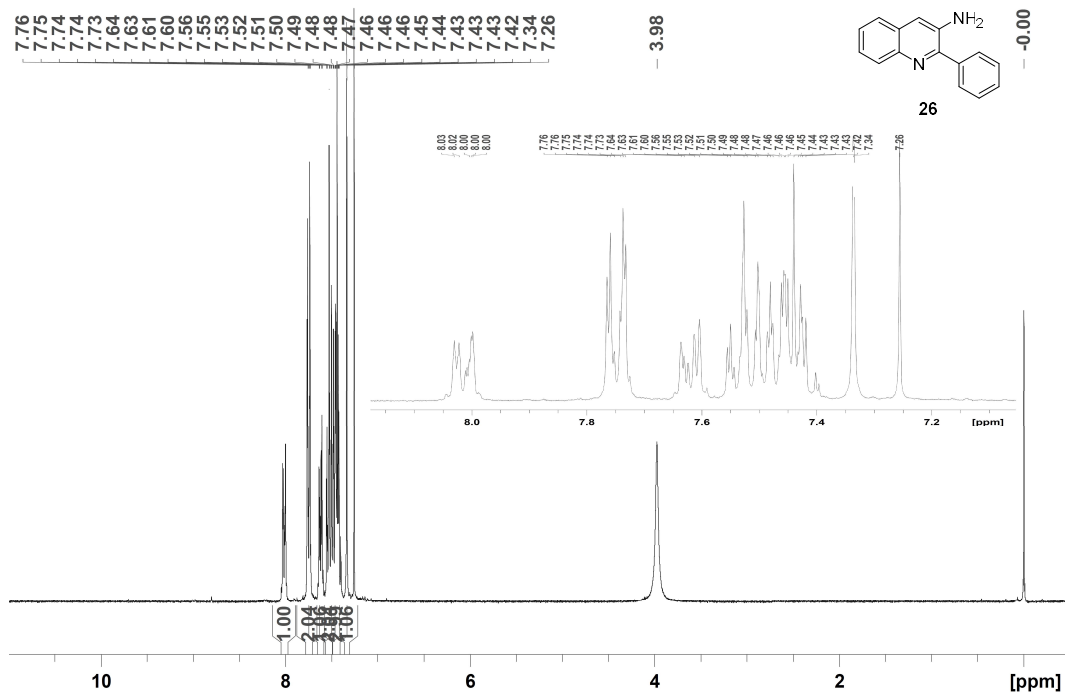

Figure S21. <sup>1</sup>H spectrum of compound 26 in CDCl<sub>3</sub>.

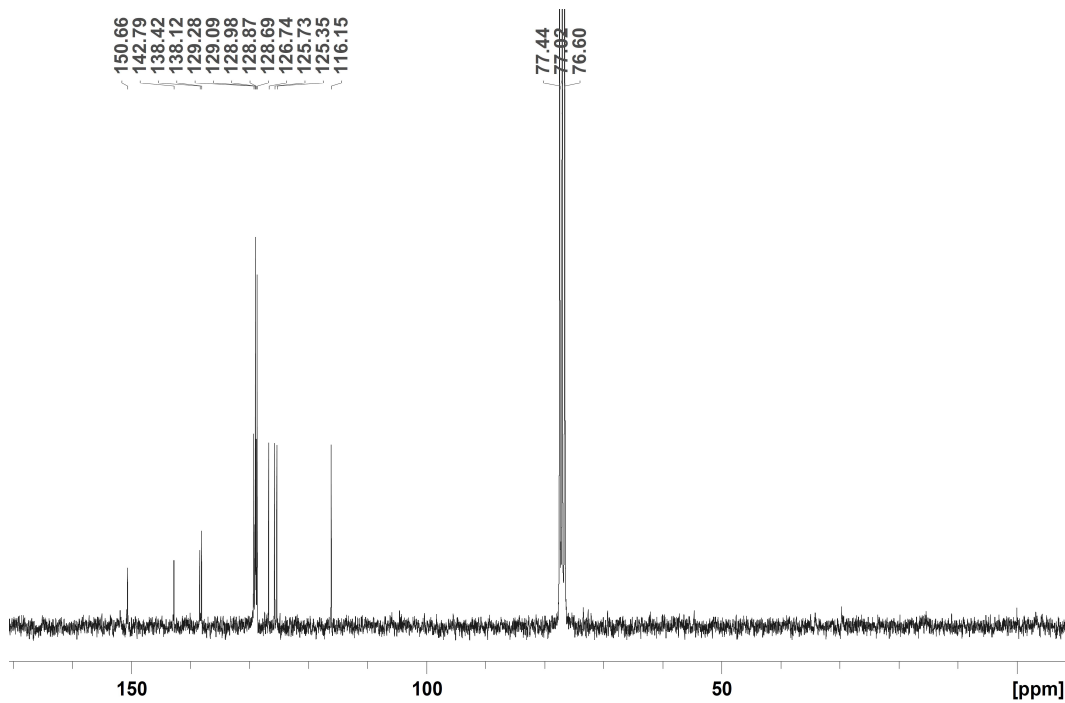

Figure S22. <sup>13</sup>C NMR (75 MHz) spectrum of compound 26 in CDCl<sub>3</sub>.

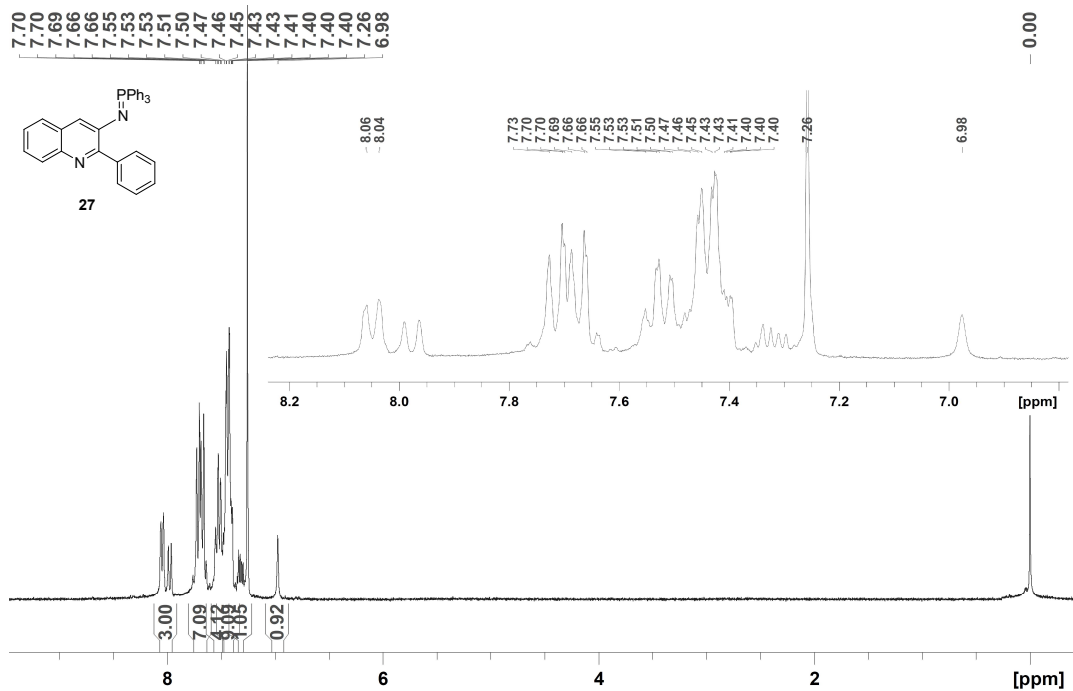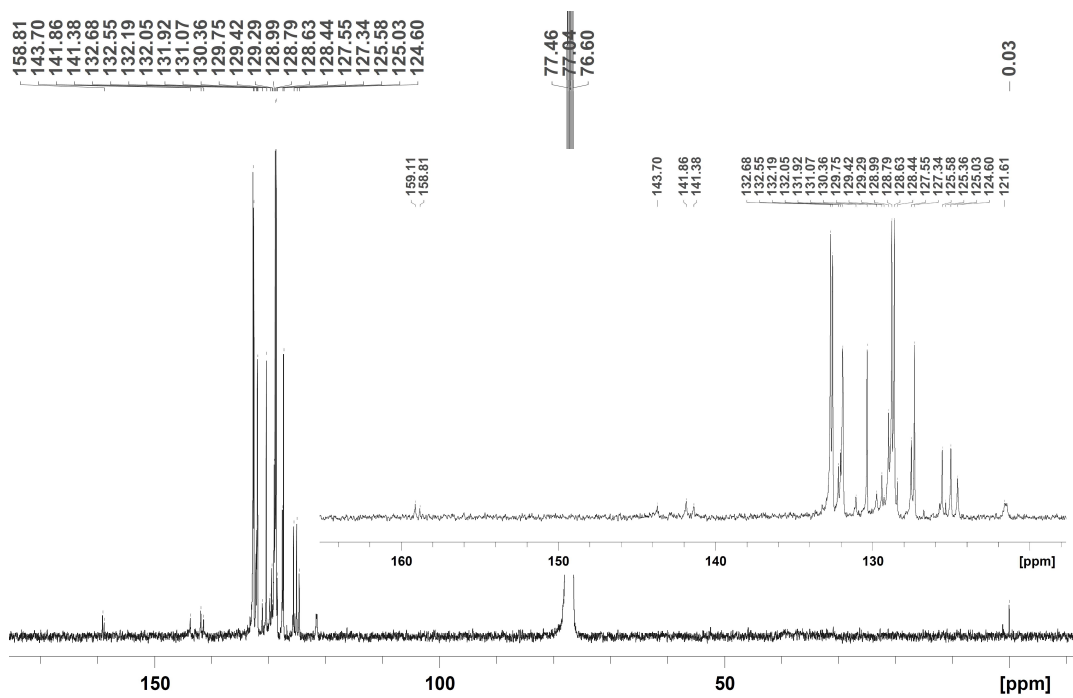

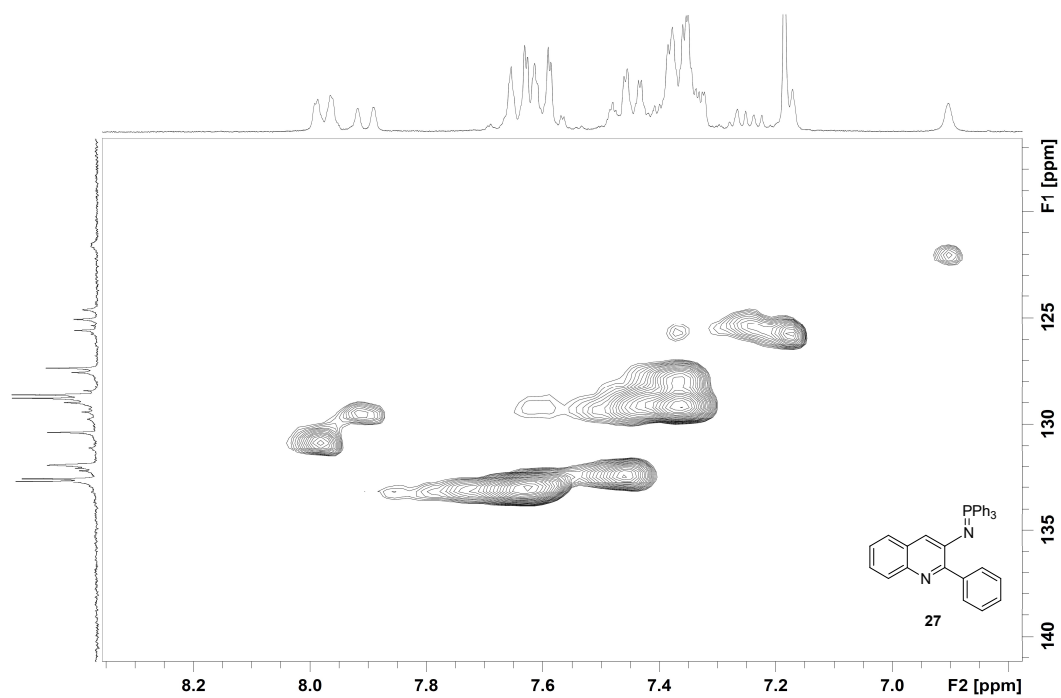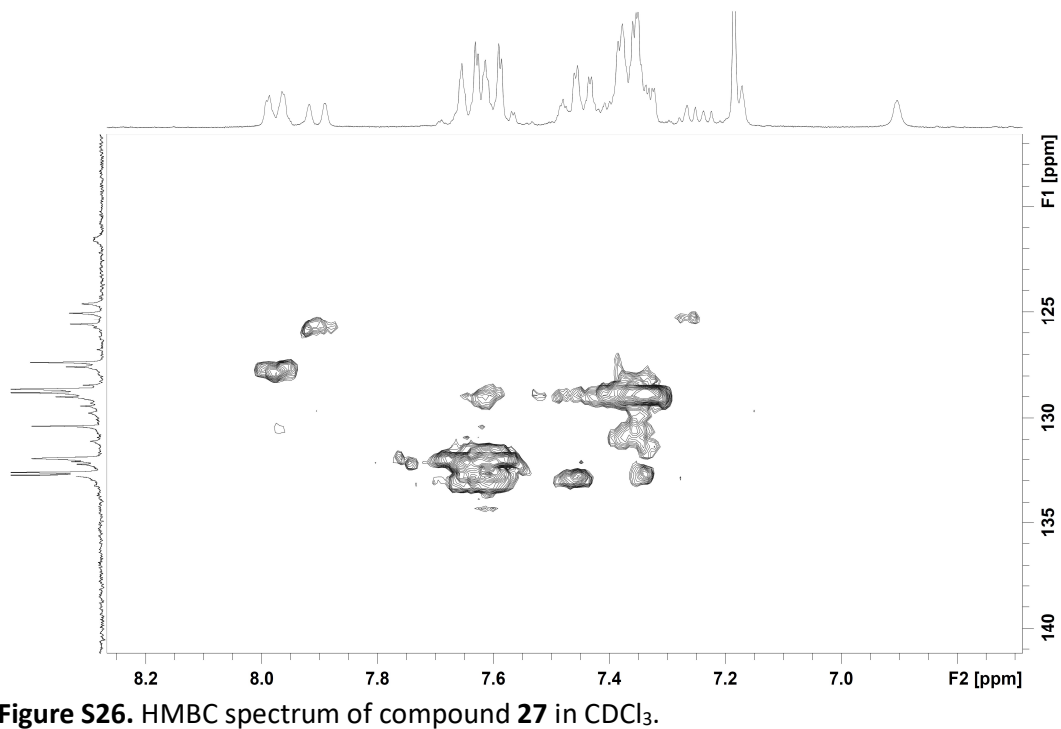



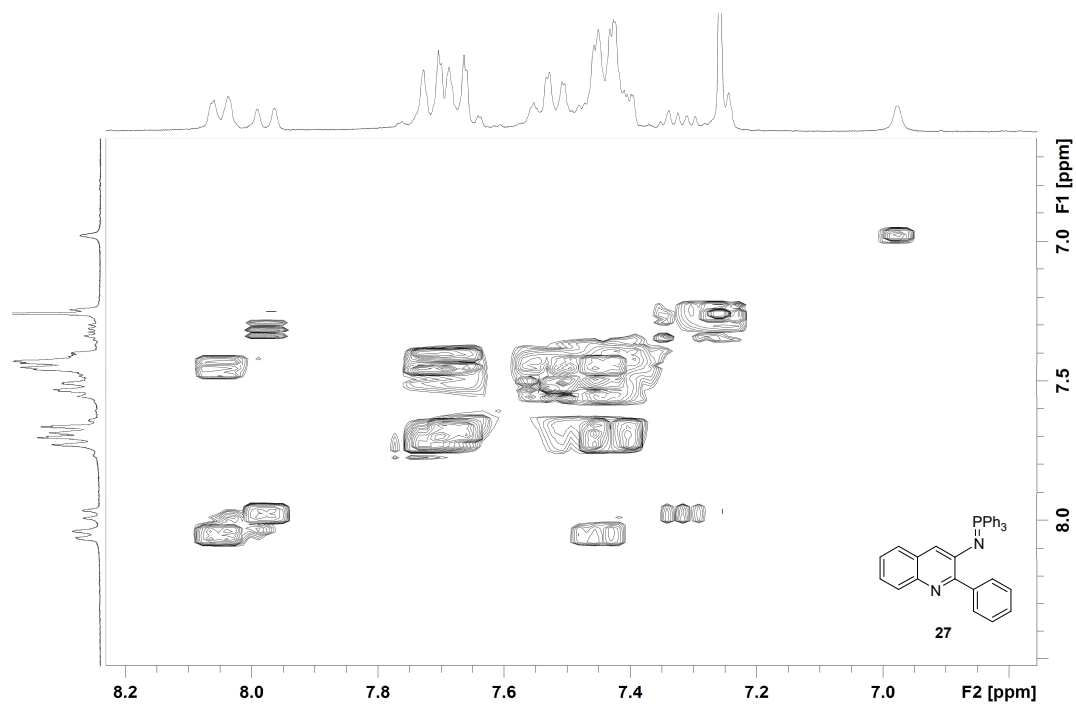

Figure S27. COSY spectrum of compound **27** in  $\text{CDCl}_3$ .

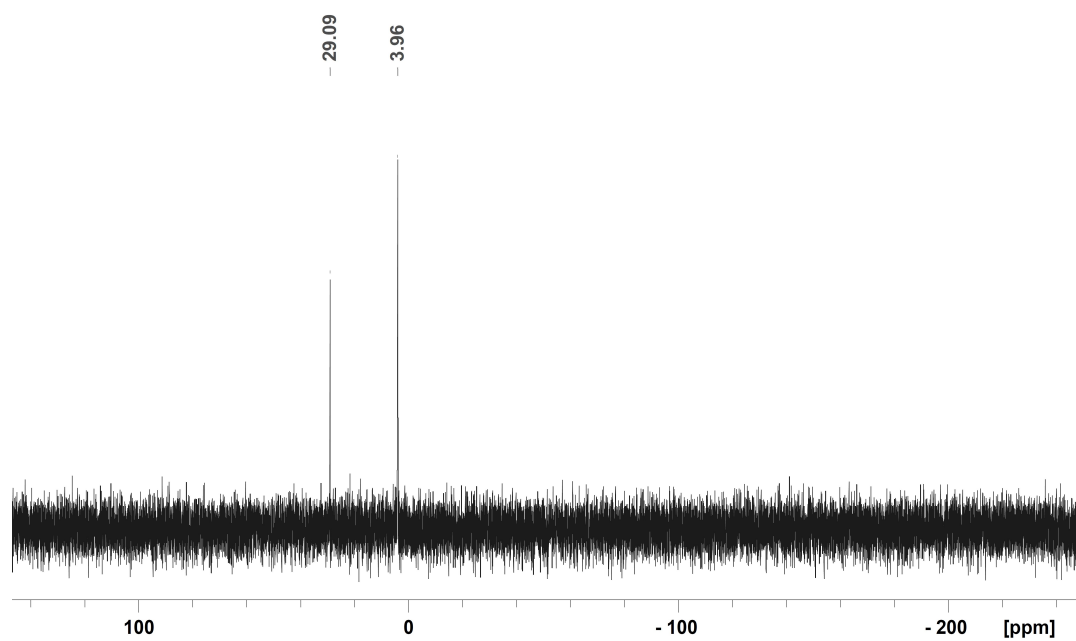

Figure S27.  $^{31}\text{P}$  spectrum of compound **27** in  $\text{CDCl}_3$ .

### Cartesian Coordinates

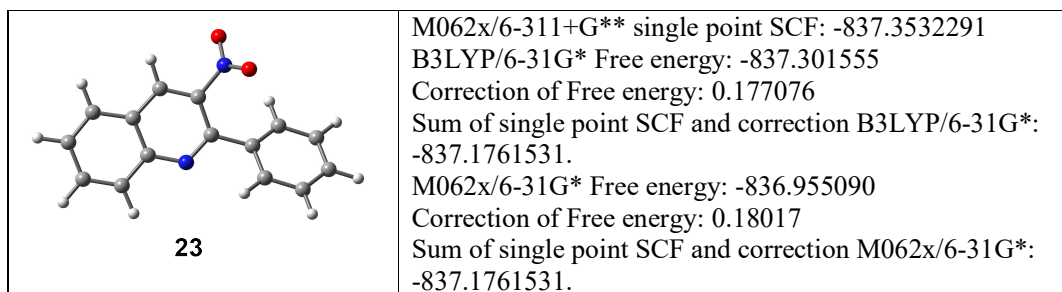

0 1

|   |             |             |             |
|---|-------------|-------------|-------------|
| C | -4.68739700 | -0.43930000 | -0.15125000 |
| C | -3.83397900 | 0.63685500  | -0.14153500 |
| C | -2.43353900 | 0.43143500  | -0.06934100 |
| C | -1.91518800 | -0.89832000 | -0.01691300 |
| C | -2.82296500 | -1.98679600 | -0.02237200 |
| C | -4.17636500 | -1.75808600 | -0.08753100 |
| C | -1.49402300 | 1.48169800  | -0.01350900 |
| C | -0.16193800 | 1.18103800  | 0.08124700  |
| C | 0.29669400  | -0.17556800 | 0.04121000  |
| N | -0.58170200 | -1.15924400 | 0.01230600  |
| N | 0.75261600  | 2.31754300  | 0.31500500  |
| O | 0.55312900  | 3.33940100  | -0.33145400 |
| O | 1.61719700  | 2.17432700  | 1.16382100  |
| C | 1.72929900  | -0.56264000 | -0.03671100 |
| C | 2.64011600  | 0.14608900  | -0.82927300 |
| C | 3.95993400  | -0.27868000 | -0.93647300 |
| C | 4.38946100  | -1.41004600 | -0.24609300 |
| C | 3.48727800  | -2.12447600 | 0.54031200  |
| C | 2.16379600  | -1.71018900 | 0.63674400  |
| H | -5.75843100 | -0.28335800 | -0.20640300 |
| H | -4.21785200 | 1.65038600  | -0.18465400 |
| H | -2.41148600 | -2.98766500 | 0.01767900  |
| H | -4.86529900 | -2.59511700 | -0.09445700 |

|   |             |             |             |
|---|-------------|-------------|-------------|
| H | -1.81181700 | 2.51737300  | -0.01145200 |
| H | 2.31875800  | 1.01901700  | -1.38614100 |
| H | 4.65213600  | 0.27450300  | -1.56070300 |
| H | 5.42073000  | -1.73536700 | -0.32411900 |
| H | 3.81490400  | -3.00733300 | 1.07757000  |
| H | 1.45223500  | -2.26843300 | 1.23150000  |

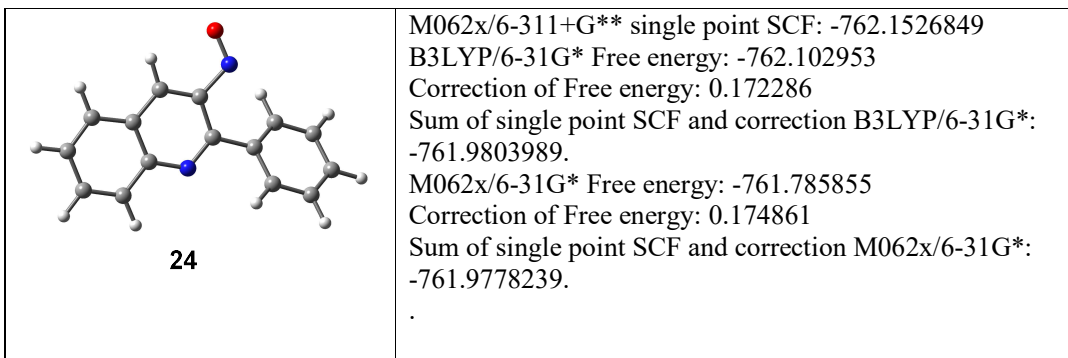

0 1

|   |             |             |             |
|---|-------------|-------------|-------------|
| C | 4.56285600  | -0.50355300 | 0.11650600  |
| C | 3.76315400  | 0.60857100  | 0.04641300  |
| C | 2.34962200  | 0.47038000  | 0.01351400  |
| C | 1.76393200  | -0.83639300 | 0.05571400  |
| C | 2.62134200  | -1.96410300 | 0.12090500  |
| C | 3.98450800  | -1.79756000 | 0.15175600  |
| C | 1.46505600  | 1.55445300  | -0.08545400 |
| C | 0.10341200  | 1.33207100  | -0.11671100 |
| C | -0.40514700 | -0.00846400 | -0.02121900 |
| N | 0.42199100  | -1.03840800 | 0.04310400  |
| N | -0.81892600 | 2.41180100  | -0.36381100 |
| O | -0.34549300 | 3.52720800  | -0.26919600 |
| C | -1.85522200 | -0.32955900 | 0.01306500  |
| C | -2.79459300 | 0.49036300  | 0.65340300  |
| C | -4.13761700 | 0.12803700  | 0.69256700  |
| C | -4.56453800 | -1.05198000 | 0.08885000  |
| C | -3.63704700 | -1.87883100 | -0.54427000 |
| C | -2.29378500 | -1.52618000 | -0.57346200 |
| H | 5.64116300  | -0.39962700 | 0.14347700  |
| H | 4.19410700  | 1.60336200  | 0.01502000  |
| H | 2.16305200  | -2.94468200 | 0.15154600  |
| H | 4.63207900  | -2.66546100 | 0.20516500  |
| H | 1.82344300  | 2.57452700  | -0.17113800 |

|   |             |             |             |
|---|-------------|-------------|-------------|
| H | -2.47800200 | 1.40559300  | 1.13412200  |
| H | -4.85010300 | 0.76926900  | 1.19867500  |
| H | -5.61258600 | -1.32858800 | 0.11524100  |
| H | -3.96172700 | -2.80038400 | -1.01410400 |
| H | -1.56453400 | -2.16894100 | -1.04895000 |

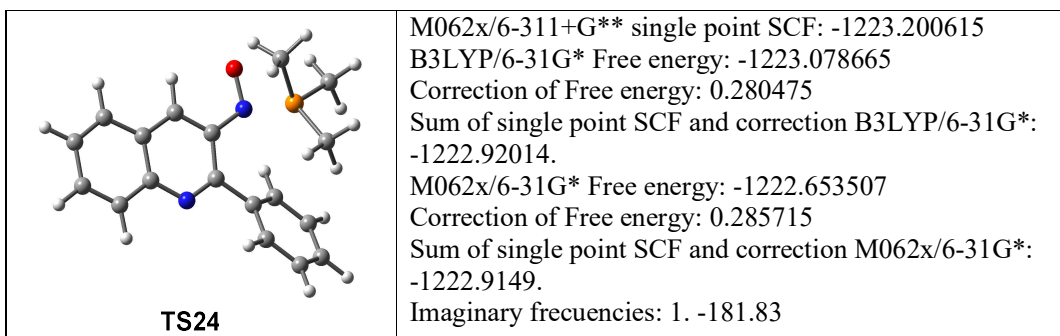

O 1

|   |             |             |             |
|---|-------------|-------------|-------------|
| N | -0.72878100 | -1.38962700 | -1.02749200 |
| C | 0.44931700  | -0.64801300 | -0.58911600 |
| N | 1.44608300  | 1.42929300  | 0.10440500  |
| C | 2.66931400  | 0.83083800  | 0.10813800  |
| C | 2.84385700  | -0.52634900 | -0.29393000 |
| C | 1.68282300  | -1.25229600 | -0.64075800 |
| C | 3.80064800  | 1.58882500  | 0.49695700  |
| C | 5.05471300  | 1.02361900  | 0.48335600  |
| C | 5.23017200  | -0.31969200 | 0.07745100  |
| C | 4.14923000  | -1.07869600 | -0.30630900 |
| C | 0.37533800  | 0.75196300  | -0.26049100 |
| C | -0.89428400 | 1.53696200  | -0.28645300 |
| C | -1.07059900 | 2.56849000  | 0.64884700  |
| C | -2.22243400 | 3.34642400  | 0.64434600  |
| C | -3.21629400 | 3.12391000  | -0.30940800 |
| C | -3.04143900 | 2.12030500  | -1.25964300 |
| C | -1.89362900 | 1.32885200  | -1.24919300 |
| O | -0.47696000 | -2.61878700 | -1.36126500 |
| H | 1.72646300  | -2.28955900 | -0.94795200 |
| H | 3.64048800  | 2.61820100  | 0.79467600  |
| H | 5.91742100  | 1.60932400  | 0.78044200  |
| H | 6.22548100  | -0.74982400 | 0.06841900  |
| H | 4.27984800  | -2.10969300 | -0.61799200 |

|   |             |             |             |
|---|-------------|-------------|-------------|
| H | -0.28170800 | 2.75270000  | 1.36681500  |
| H | -2.34281300 | 4.13362700  | 1.38058800  |
| H | -4.11152400 | 3.73581000  | -0.31882500 |
| H | -3.79512800 | 1.95793600  | -2.02260800 |
| H | -1.76269100 | 0.55409200  | -1.99177300 |
| P | -1.93053200 | -1.64265900 | 0.56021600  |
| C | -3.35156200 | -2.29411700 | -0.37334200 |
| C | -2.64456000 | -0.52284200 | 1.84151200  |
| C | -1.17128000 | -3.04247800 | 1.44678100  |
| H | -3.90258600 | -1.46442400 | -0.81897300 |
| H | -4.01937100 | -2.87272300 | 0.26775700  |
| H | -2.94471500 | -2.92460400 | -1.16485900 |
| H | -3.36534400 | -1.06775700 | 2.45922400  |
| H | -3.14083700 | 0.31679100  | 1.35513800  |
| H | -1.84544300 | -0.13632400 | 2.47453400  |
| H | -0.46361200 | -3.49183700 | 0.74206700  |
| H | -1.90900500 | -3.79302500 | 1.73659300  |
| H | -0.64834300 | -2.68042800 | 2.33274100  |

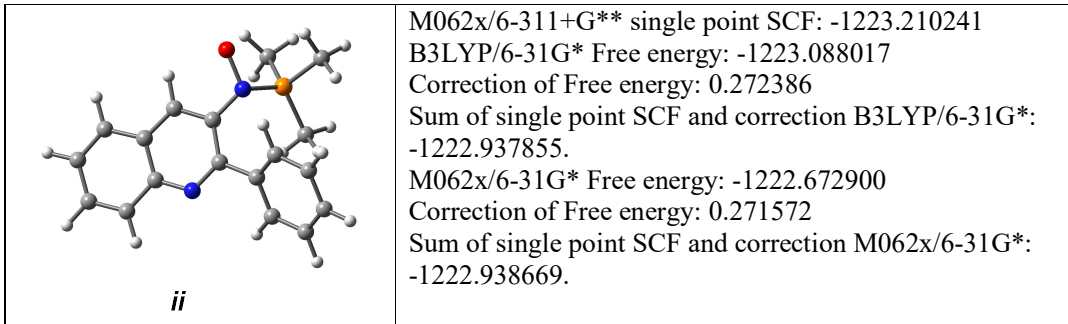

O 1

|   |             |             |             |
|---|-------------|-------------|-------------|
| P | 1.80479200  | -1.85073500 | 0.54399700  |
| C | 3.39336400  | -2.24175400 | -0.23008400 |
| C | 1.11799000  | -3.38247900 | 1.24410200  |
| C | 2.07427200  | -0.65120000 | 1.88434900  |
| N | 0.81847500  | -1.37094300 | -0.79598500 |
| C | -0.35798100 | -0.61671000 | -0.48617300 |
| N | -1.38968100 | 1.45363500  | 0.19049700  |
| C | -2.60865900 | 0.85459300  | 0.13549500  |
| C | -2.76618200 | -0.48588400 | -0.33143900 |
| C | -1.59531400 | -1.20492500 | -0.64598200 |
| C | -3.75639600 | 1.59863700  | 0.50661200  |
| C | -5.00806900 | 1.03700700  | 0.41814400  |
| C | -5.16684100 | -0.28825200 | -0.05349400 |
| C | -4.07267300 | -1.03224600 | -0.42522500 |
| C | -0.30382000 | 0.78175800  | -0.14674500 |
| C | 0.95017900  | 1.59317100  | -0.20133300 |
| C | 1.12631000  | 2.64455600  | 0.70952200  |
| C | 2.25858900  | 3.45131300  | 0.65788100  |
| C | 3.22812400  | 3.23722300  | -0.32113000 |
| C | 3.04784200  | 2.21535200  | -1.25219800 |
| C | 1.92388500  | 1.39394000  | -1.19238200 |
| O | 0.58856800  | -2.48058400 | -1.62305600 |
| H | 3.14306500  | -2.77873300 | -1.14709500 |



|   |             |             |             |
|---|-------------|-------------|-------------|
| H | 4.01712500  | -2.85671900 | 0.41995900  |
| H | 3.91255600  | -1.31585500 | -0.48104200 |
| H | 1.88770900  | -4.03747500 | 1.65431100  |
| H | 0.63253900  | -3.85811300 | 0.38492300  |
| H | 0.37883200  | -3.14961100 | 2.01185300  |
| H | 2.57944700  | 0.23695600  | 1.51032300  |
| H | 2.69225200  | -1.13555400 | 2.64533700  |
| H | 1.12007800  | -0.36378100 | 2.32643300  |
| H | -1.61914900 | -2.22080600 | -1.01984600 |
| H | -3.60844500 | 2.61538700  | 0.85066400  |
| H | -5.88262000 | 1.61118700  | 0.70290600  |
| H | -6.16149900 | -0.71442900 | -0.12359300 |
| H | -4.19049000 | -2.04831700 | -0.78683800 |
| H | 0.35273500  | 2.82517300  | 1.44526100  |
| H | 2.37991000  | 4.25474200  | 1.37630000  |
| H | 4.10765600  | 3.86978000  | -0.36737200 |
| H | 3.78031800  | 2.06138600  | -2.03722800 |
| H | 1.78828400  | 0.60702700  | -1.92187500 |

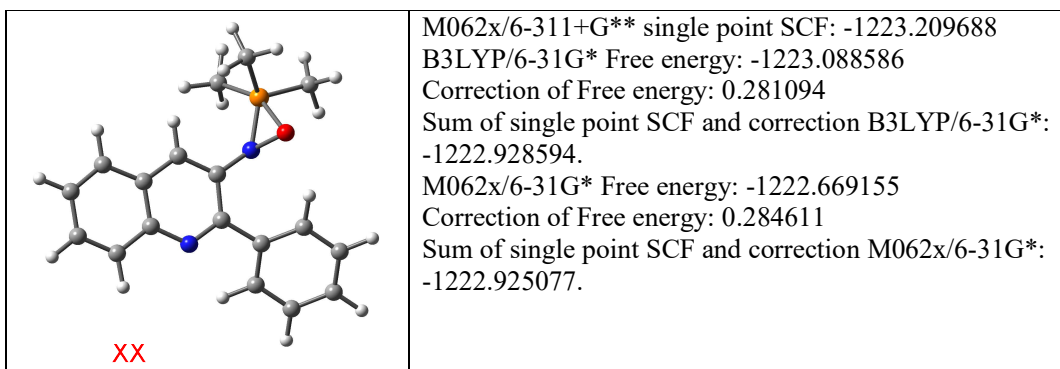

O 1

|   |             |             |             |
|---|-------------|-------------|-------------|
| P | 2.01629600  | -2.20566500 | 0.09885400  |
| C | 1.59225400  | -3.59329300 | -1.02275700 |
| C | 1.51950500  | -2.93854800 | 1.74855000  |
| C | 3.81985400  | -2.09063100 | 0.35923200  |
| N | 1.23972300  | -0.71771500 | 0.11209400  |
| C | -0.11352600 | -0.34133800 | -0.01401000 |
| N | -1.70897300 | 1.46465800  | -0.07335700 |
| C | -2.72394300 | 0.56369800  | -0.06098000 |
| C | -2.48995500 | -0.84130300 | -0.02704400 |
| C | -1.14108600 | -1.25763100 | -0.00610500 |
| C | -4.06111900 | 1.03583200  | -0.08196500 |
| C | -5.11099300 | 0.14908200  | -0.07350100 |
| C | -4.87622200 | -1.24640200 | -0.04216400 |
| C | -3.59129700 | -1.73313000 | -0.01816100 |
| C | -0.44979100 | 1.06669000  | -0.05649400 |
| C | 0.56913500  | 2.15364400  | -0.02928300 |
| C | 1.83055100  | 2.04156800  | -0.63187900 |
| C | 2.72060700  | 3.11322400  | -0.59648600 |
| C | 2.37846000  | 4.30104500  | 0.04380900  |
| C | 1.12530000  | 4.42116600  | 0.64380500  |
| C | 0.22800100  | 3.36182100  | 0.59998400  |
| O | 1.97679900  | -0.97839500 | -1.21593500 |
| H | 0.58557100  | -3.44094600 | -1.41350700 |

|   |             |             |             |
|---|-------------|-------------|-------------|
| H | 1.63919600  | -4.55117000 | -0.50153900 |
| H | 2.27619000  | -3.58611500 | -1.87079900 |
| H | 2.04901000  | -3.87694700 | 1.93339300  |
| H | 0.44601900  | -3.13672400 | 1.78980300  |
| H | 1.76266400  | -2.23592500 | 2.54915500  |
| H | 4.33061500  | -2.09831500 | -0.60252500 |
| H | 4.18754500  | -2.89582900 | 0.99760900  |
| H | 4.01536000  | -1.13130700 | 0.84215700  |
| H | -0.92502000 | -2.31890400 | 0.03156700  |
| H | -4.21593200 | 2.10753300  | -0.10858100 |
| H | -6.13071300 | 0.51696000  | -0.09204900 |
| H | -5.71715800 | -1.93045600 | -0.03720000 |
| H | -3.40626600 | -2.80233400 | 0.00610800  |
| H | 2.11372700  | 1.13135100  | -1.14404500 |
| H | 3.68783500  | 3.01545400  | -1.07758300 |
| H | 3.07908700  | 5.12860900  | 0.07217500  |
| H | 0.84646800  | 5.34231900  | 1.14378900  |
| H | -0.75268800 | 3.45331800  | 1.04828200  |

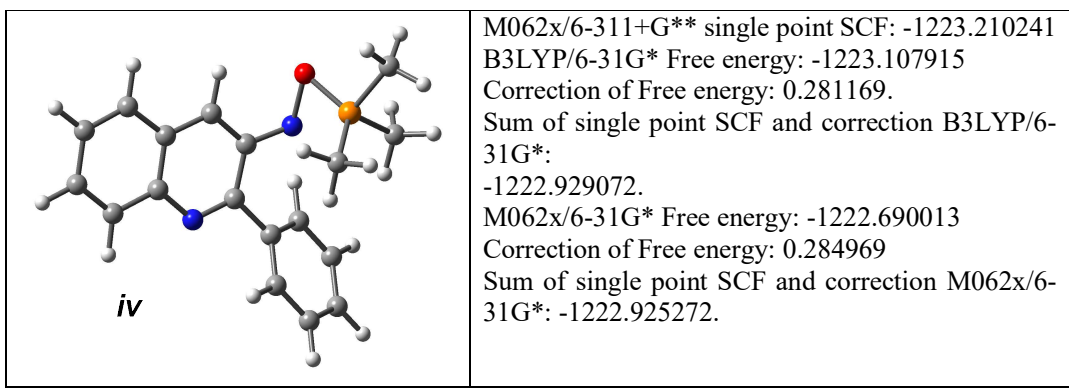

O 1

|   |             |             |             |
|---|-------------|-------------|-------------|
| P | -2.06706400 | -2.05805200 | 0.23823700  |
| C | -3.63980000 | -1.27502500 | -0.26483300 |
| C | -1.47124000 | -1.41519100 | 1.84272700  |
| C | -2.63355700 | -3.76729500 | 0.69817100  |
| O | -1.00567800 | -2.47453300 | -0.90431000 |
| N | -0.98834200 | -0.91144300 | -0.89255700 |
| C | 0.29546200  | -0.47074200 | -0.59761100 |
| N | 1.65367400  | 1.42213100  | 0.08004200  |
| C | 2.76550400  | 0.63654500  | 0.04822300  |
| C | 2.69796600  | -0.74038800 | -0.32489000 |
| C | 1.42588700  | -1.27371800 | -0.63319600 |
| C | 4.01797600  | 1.20767500  | 0.38962100  |
| C | 5.16486800  | 0.44402700  | 0.35838000  |
| C | 5.10133900  | -0.92110700 | -0.01576900 |
| C | 3.89681300  | -1.50178400 | -0.34966800 |
| C | 0.47278700  | 0.92907300  | -0.24111800 |
| C | -0.66607300 | 1.89220900  | -0.16952600 |
| C | -1.74137700 | 1.87129400  | -1.07473300 |
| C | -2.75822500 | 2.82463200  | -0.99196700 |
| C | -2.72688700 | 3.80844200  | -0.00223000 |
| C | -1.65973300 | 3.84213000  | 0.89872000  |
| C | -0.63756600 | 2.89991300  | 0.81074400  |

|   |             |             |             |
|---|-------------|-------------|-------------|
| H | -3.56782000 | -0.18899100 | -0.18737800 |
| H | -4.46803700 | -1.65270600 | 0.34261600  |
| H | -3.81883000 | -1.53591200 | -1.31278200 |
| H | -2.04518500 | -1.85248400 | 2.66514000  |
| H | -1.54431500 | -0.32571000 | 1.86698000  |
| H | -0.41890100 | -1.69310200 | 1.95646500  |
| H | -3.04411500 | -4.27206300 | -0.18244200 |
| H | -3.40329400 | -3.73820800 | 1.47682000  |
| H | -1.78743800 | -4.35779100 | 1.06446000  |
| H | 1.32663000  | -2.32008700 | -0.89900700 |
| H | 4.03541100  | 2.25717300  | 0.66820000  |
| H | 6.12301700  | 0.88594100  | 0.61812300  |
| H | 6.01275700  | -1.51309100 | -0.03939400 |
| H | 3.84857400  | -2.54985700 | -0.63689900 |
| H | -1.76944400 | 1.11379600  | -1.84968400 |
| H | -3.57223400 | 2.80306200  | -1.71251100 |
| H | -3.52274100 | 4.54598100  | 0.06261900  |
| H | -1.62148000 | 4.60762800  | 1.66968400  |
| H | 0.20664100  | 2.93451900  | 1.49126300  |

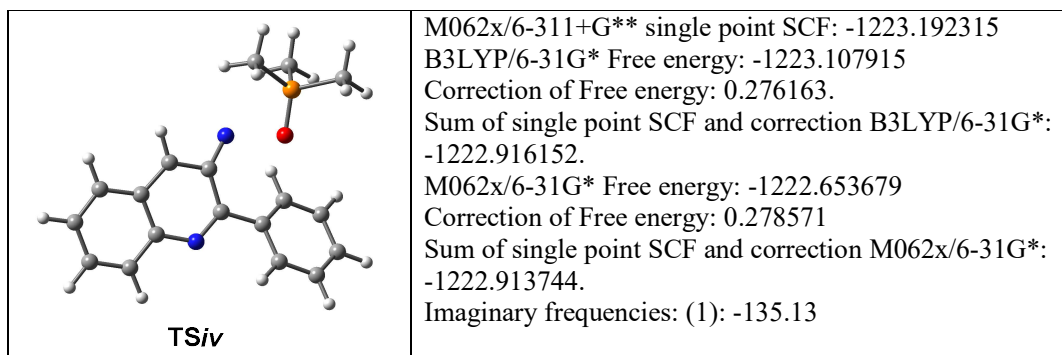

0 1

|   |             |             |             |
|---|-------------|-------------|-------------|
| N | 0.66314600  | -1.04617900 | 0.88464000  |
| C | -0.46559700 | -0.60640600 | 0.35946600  |
| C | -0.89377300 | 0.78986100  | 0.09601500  |
| N | -2.14852400 | 1.07779800  | -0.14552300 |
| C | -3.12506200 | 0.12034700  | -0.08218900 |
| C | -2.83044400 | -1.25510200 | 0.15618600  |
| C | -1.46812900 | -1.59750100 | 0.25856400  |
| C | -4.46803900 | 0.51272000  | -0.25869300 |
| C | -5.48139100 | -0.42357300 | -0.22030800 |
| C | -5.19029900 | -1.78782500 | -0.00572800 |
| C | -3.88905500 | -2.19737900 | 0.18170200  |
| C | 0.04884700  | 1.93811900  | 0.07087700  |
| C | 1.18243500  | 1.98508400  | 0.89309700  |
| C | 1.98082100  | 3.12439000  | 0.92480800  |
| C | 1.68194200  | 4.21954400  | 0.11718600  |
| C | 0.56311100  | 4.17669200  | -0.71453000 |
| C | -0.25244800 | 3.05223400  | -0.72714200 |
| H | -1.16163000 | -2.63255500 | 0.34990800  |
| H | -4.66879100 | 1.56380300  | -0.42732700 |
| H | -6.51057000 | -0.11187100 | -0.35880300 |
| H | -5.99693600 | -2.51186700 | 0.01519800  |
| H | -3.65742100 | -3.24432000 | 0.34861200  |
| H | 1.42111900  | 1.12418300  | 1.50039400  |

|   |             |             |             |
|---|-------------|-------------|-------------|
| H | 2.84459300  | 3.15518400  | 1.58055600  |
| H | 2.31501900  | 5.10027700  | 0.13497400  |
| H | 0.32319100  | 5.02376700  | -1.34800200 |
| H | -1.13978500 | 3.02045100  | -1.34601800 |
| O | 2.11200200  | -0.44294800 | -0.49070800 |
| P | 3.12644500  | -1.55625200 | -0.24888800 |
| C | 3.73112400  | -1.63566700 | 1.46472000  |
| C | 2.52354900  | -3.22465600 | -0.65912800 |
| C | 4.59696600  | -1.28818600 | -1.29353600 |
| H | 4.21934100  | -0.69200900 | 1.71503600  |
| H | 2.86770700  | -1.76779300 | 2.11596100  |
| H | 4.43853000  | -2.45696800 | 1.59890400  |
| H | 2.17719000  | -3.23204400 | -1.69426000 |
| H | 3.31074100  | -3.97155800 | -0.53337500 |
| H | 1.68234400  | -3.44646000 | -0.00391700 |
| H | 4.29892200  | -1.29417700 | -2.34331300 |
| H | 5.02612600  | -0.31216500 | -1.06155600 |
| H | 5.34792000  | -2.06403800 | -1.12601100 |

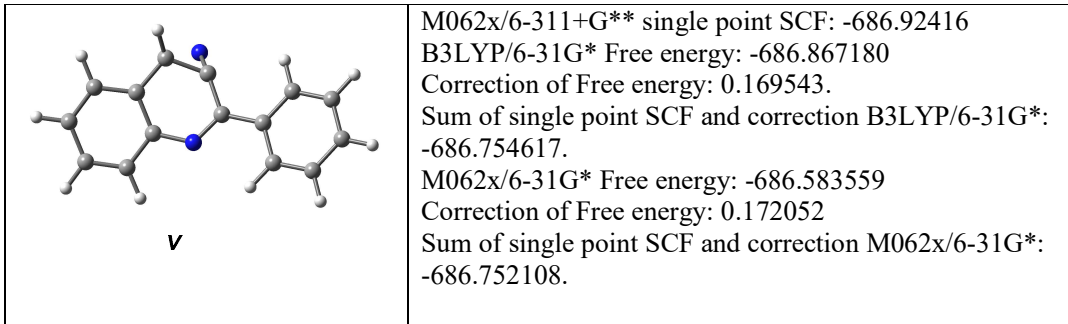

0 1

|   |             |             |             |
|---|-------------|-------------|-------------|
| C | -4.47437900 | -0.41279800 | 0.23081700  |
| C | -3.68531200 | 0.71143700  | 0.43448000  |
| C | -2.30318900 | 0.66045800  | 0.22937000  |
| C | -1.69422600 | -0.58650600 | -0.10738700 |
| C | -2.51356500 | -1.70926000 | -0.31775500 |
| C | -3.88708000 | -1.62069500 | -0.16371900 |
| C | -1.39465200 | 1.80090800  | 0.39507200  |
| C | -0.06923900 | 1.47210400  | -0.13228100 |
| C | 0.55648500  | 0.15164700  | -0.10044200 |
| N | -0.31152900 | -0.80756000 | -0.13485600 |
| N | -0.63849600 | 2.29584400  | -0.89412000 |
| C | 2.00105800  | -0.07350400 | -0.00744300 |
| C | 2.88350600  | 1.01514300  | -0.01244400 |
| C | 4.25700200  | 0.80744900  | 0.06463700  |
| C | 4.76157500  | -0.48817600 | 0.14824500  |
| C | 3.88750700  | -1.57798900 | 0.15412300  |
| C | 2.51706600  | -1.37586300 | 0.07819200  |
| H | -5.54803300 | -0.35226600 | 0.36809400  |
| H | -4.13981000 | 1.65168800  | 0.72831500  |
| H | -2.03435100 | -2.64398700 | -0.58260700 |
| H | -4.50647800 | -2.49426800 | -0.33150800 |
| H | -1.53708900 | 2.54075000  | 1.17331100  |
| H | 2.49102400  | 2.02420100  | -0.08060500 |



|   |            |             |            |
|---|------------|-------------|------------|
| H | 4.93205300 | 1.65539200  | 0.05868700 |
| H | 5.83173500 | -0.65072100 | 0.20891000 |
| H | 4.28045900 | -2.58624900 | 0.21912200 |
| H | 1.82532600 | -2.20865600 | 0.08032700 |

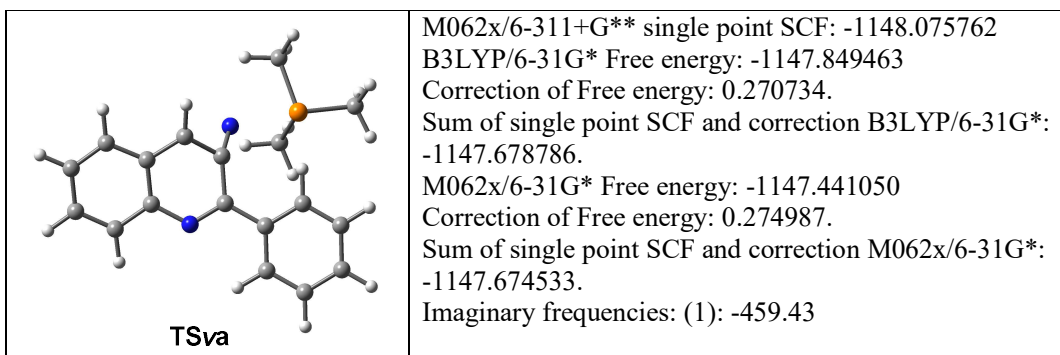

0 1

|   |             |             |             |
|---|-------------|-------------|-------------|
| N | 0.20372100  | -1.53436400 | -0.45253900 |
| C | -0.41506700 | -0.46367800 | -0.72247100 |
| N | -1.71864500 | 1.20989700  | 0.32890900  |
| C | -2.79974000 | 0.34502300  | 0.25696300  |
| C | -2.81061800 | -0.80506900 | -0.59431800 |
| C | -1.59578600 | -1.09277200 | -1.27748000 |
| C | -3.96280200 | 0.67923600  | 0.96931200  |
| C | -5.11741200 | -0.07166500 | 0.82474700  |
| C | -5.14802000 | -1.16489300 | -0.05725000 |
| C | -4.01309000 | -1.52370500 | -0.76039300 |
| C | -0.55592700 | 0.90460000  | -0.15737300 |
| C | 0.52547500  | 1.90173900  | -0.18880200 |
| C | 0.37903100  | 3.12377900  | 0.48791600  |
| C | 1.39201600  | 4.07168800  | 0.45121700  |
| C | 2.56375900  | 3.82188600  | -0.26624700 |
| C | 2.71513100  | 2.61515300  | -0.94589200 |
| C | 1.70476200  | 1.65881500  | -0.90651000 |
| H | -1.50885800 | -1.80804800 | -2.07844200 |
| H | -3.93229800 | 1.55026100  | 1.61283300  |
| H | -6.00836700 | 0.19633400  | 1.38095600  |
| H | -6.06296700 | -1.73332500 | -0.17948100 |
| H | -4.02870300 | -2.37419700 | -1.43360800 |
| H | -0.53776300 | 3.30449500  | 1.03406000  |

|   |            |             |             |
|---|------------|-------------|-------------|
| H | 1.27067600 | 5.01000800  | 0.98084500  |
| H | 3.35263100 | 4.56524400  | -0.29488800 |
| H | 3.62031200 | 2.41763000  | -1.50891700 |
| H | 1.83144600 | 0.71762200  | -1.42724000 |
| P | 2.68370000 | -1.87462600 | 0.12810700  |
| C | 2.36893900 | -1.72548800 | 1.94765500  |
| C | 4.55015300 | -1.75952500 | 0.11140300  |
| C | 2.46213300 | -3.69253100 | -0.13399500 |
| H | 2.61467100 | -0.71334200 | 2.27752300  |
| H | 2.95980800 | -2.43980400 | 2.52886200  |
| H | 1.30781800 | -1.89504300 | 2.13416900  |
| H | 5.01830400 | -2.46578300 | 0.80500900  |
| H | 4.85401800 | -0.74596500 | 0.38297600  |
| H | 4.91773200 | -1.96116900 | -0.89751700 |
| H | 1.39758400 | -3.92170100 | -0.08521200 |
| H | 3.00196500 | -4.28547100 | 0.61012800  |
| H | 2.82333300 | -3.96264400 | -1.12916000 |

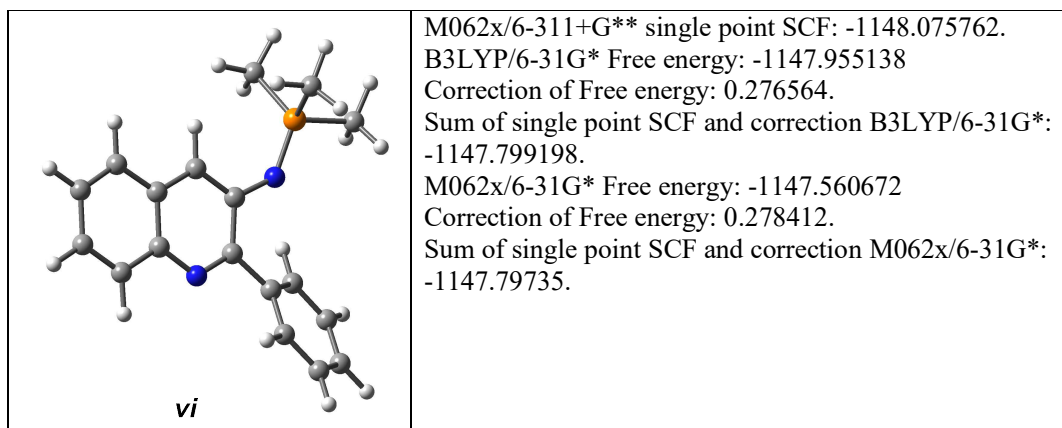

0 1

|   |             |             |             |
|---|-------------|-------------|-------------|
| P | 1.70520200  | 2.46436700  | 0.11236200  |
| C | 1.18357800  | 3.23773700  | 1.69656300  |
| C | 1.30956400  | 3.73570400  | -1.16060200 |
| C | 3.52238400  | 2.42154900  | 0.16600400  |
| N | 1.21468200  | 0.98482100  | -0.14607600 |
| C | -0.05603000 | 0.45038500  | -0.14269400 |
| N | -1.37836700 | -1.58723100 | -0.02345600 |
| C | -2.52441500 | -0.85781300 | -0.03596900 |
| C | -2.50132500 | 0.56394700  | -0.12157300 |
| C | -1.23452900 | 1.18387900  | -0.16986900 |
| C | -3.76971700 | -1.52955100 | 0.02869400  |
| C | -4.94804000 | -0.82031900 | 0.00692600  |
| C | -4.92680500 | 0.59126000  | -0.08188400 |
| C | -3.73185900 | 1.26946600  | -0.14501400 |
| C | -0.20118800 | -0.99935100 | -0.08950600 |
| C | 0.96897200  | -1.92698500 | -0.06457700 |
| C | 0.86609900  | -3.11393700 | 0.67663600  |
| C | 1.90560200  | -4.03665400 | 0.70027800  |
| C | 3.06716600  | -3.80289700 | -0.03424300 |
| C | 3.17526500  | -2.63706800 | -0.78872000 |
| C | 2.14227200  | -1.70301400 | -0.79873200 |
| H | 0.09494000  | 3.28891600  | 1.74273200  |

|   |             |             |             |
|---|-------------|-------------|-------------|
| H | 1.59539100  | 4.24409000  | 1.80053700  |
| H | 1.53276400  | 2.61509400  | 2.52203100  |
| H | 1.81865300  | 4.67858100  | -0.94629700 |
| H | 0.23390100  | 3.91310000  | -1.19766200 |
| H | 1.63010100  | 3.36634500  | -2.13641500 |
| H | 3.83393900  | 1.72919800  | 0.94868900  |
| H | 3.93469600  | 3.41329600  | 0.36265600  |
| H | 3.89742500  | 2.05333900  | -0.78977900 |
| H | -1.19678500 | 2.26794900  | -0.22514600 |
| H | -3.75338100 | -2.61127100 | 0.09097700  |
| H | -5.89825000 | -1.34012300 | 0.05541300  |
| H | -5.86222600 | 1.13991200  | -0.10028800 |
| H | -3.71821500 | 2.35320100  | -0.21219400 |
| H | -0.04849700 | -3.30128700 | 1.22420900  |
| H | 1.80713600  | -4.94238500 | 1.28900500  |
| H | 3.87733900  | -4.52398000 | -0.02164100 |
| H | 4.06888900  | -2.45271100 | -1.37585100 |
| H | 2.23797500  | -0.79793600 | -1.37999000 |

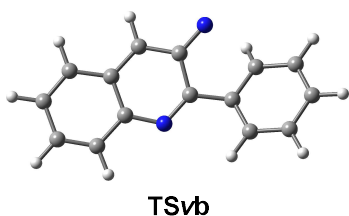

M062x/6-311+G\*\* single point SCF: -686.87897.  
 B3LYP/6-31G\* Free energy: -686.840002  
 Correction of Free energy: 0.169438.  
 Sum of single point SCF and correction B3LYP/6-31G\*:  
 -686.709532.  
 M062x/6-31G\* Free energy: -686.538314.  
 Correction of Free energy: 0.17107.  
 Sum of single point SCF and correction M062x/6-31G\*:  
 -686.7079.  
 Imaginary frequencies: (1): -263.95

0 1

|   |             |             |             |
|---|-------------|-------------|-------------|
| C | 4.55508100  | -0.00995000 | -0.06721900 |
| C | 3.64108800  | 1.00691100  | -0.07566500 |
| C | 2.23858200  | 0.73113300  | -0.01928600 |
| C | 1.81106100  | -0.64913700 | 0.05936900  |
| C | 2.79201500  | -1.67353500 | 0.04710300  |
| C | 4.12700900  | -1.36490200 | -0.01507500 |
| C | 1.27687600  | 1.73745200  | 0.01658700  |
| C | -0.10514200 | 1.37742800  | -0.07141700 |
| C | -0.40630000 | -0.06068200 | 0.10337100  |
| N | 0.50637600  | -0.99946500 | 0.16173600  |
| C | -1.82430100 | -0.29186000 | 0.21307500  |
| C | -2.63324000 | 0.85864900  | 0.37378000  |
| C | -4.01631500 | 0.78808500  | 0.12333800  |
| C | -4.58789700 | -0.43447100 | -0.17281200 |
| C | -3.79698100 | -1.60097800 | -0.23482400 |
| C | -2.43066500 | -1.53539900 | -0.04497100 |
| N | -1.03160100 | 2.23029200  | -0.36634600 |
| H | 5.61532500  | 0.21214200  | -0.10730800 |
| H | 3.96375200  | 2.04150500  | -0.12106200 |
| H | 2.44399700  | -2.69813000 | 0.09628800  |
| H | 4.86677900  | -2.15713700 | -0.02261200 |
| H | 1.54932300  | 2.78480100  | -0.03171100 |
| H | -4.62878700 | 1.67566800  | 0.22455700  |

|   |             |             |             |
|---|-------------|-------------|-------------|
| H | -5.65769700 | -0.50506500 | -0.33455600 |
| H | -4.26444700 | -2.55091700 | -0.46759500 |
| H | -1.79795600 | -2.40699500 | -0.15859800 |
| H | -2.25893100 | 1.71586300  | 0.94274000  |

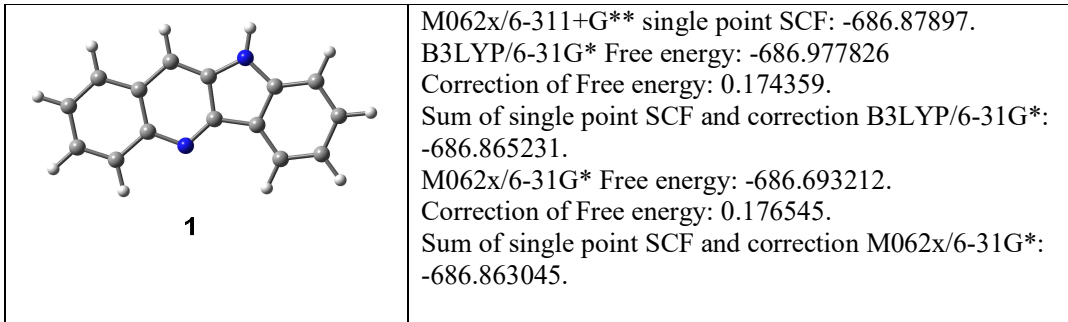

O 1

|   |             |             |             |
|---|-------------|-------------|-------------|
| C | -4.55753200 | 0.19577000  | -0.00000600 |
| C | -3.55019600 | 1.12826500  | -0.00000600 |
| C | -2.18694700 | 0.72983200  | -0.00000400 |
| C | -1.87925700 | -0.67648500 | -0.00000200 |
| C | -2.94903600 | -1.61045400 | -0.00000200 |
| C | -4.25430800 | -1.18777200 | -0.00000500 |
| C | -1.12272200 | 1.66462200  | -0.00000300 |
| C | 0.15300900  | 1.16073000  | -0.00000100 |
| C | 0.36200600  | -0.26574300 | 0.00000100  |
| N | -0.60596200 | -1.15494000 | 0.00000000  |
| C | 1.79912800  | -0.47262800 | 0.00000300  |
| C | 2.39468900  | 0.81043900  | 0.00000200  |
| C | 3.77915100  | 0.96888400  | 0.00000400  |
| C | 4.55893300  | -0.18449000 | 0.00000700  |
| C | 3.98146500  | -1.46343800 | 0.00000700  |
| C | 2.59969700  | -1.61479600 | 0.00000500  |
| N | 1.39212500  | 1.77550900  | 0.00000000  |
| H | -5.59308800 | 0.51705500  | -0.00000800 |
| H | -3.78369900 | 2.18830100  | -0.00000700 |
| H | -2.68783500 | -2.66186700 | -0.00000100 |
| H | -5.06070000 | -1.91235600 | -0.00000500 |
| H | -1.33029100 | 2.72975800  | -0.00000500 |
| H | 4.23658100  | 1.95185500  | 0.00000400  |



|   |            |             |             |
|---|------------|-------------|-------------|
| H | 5.63905700 | -0.08955200 | 0.00000800  |
| H | 4.62182200 | -2.33754000 | 0.00000900  |
| H | 2.13841100 | -2.59520800 | 0.00000600  |
| H | 1.54810700 | 2.76915300  | -0.00000100 |

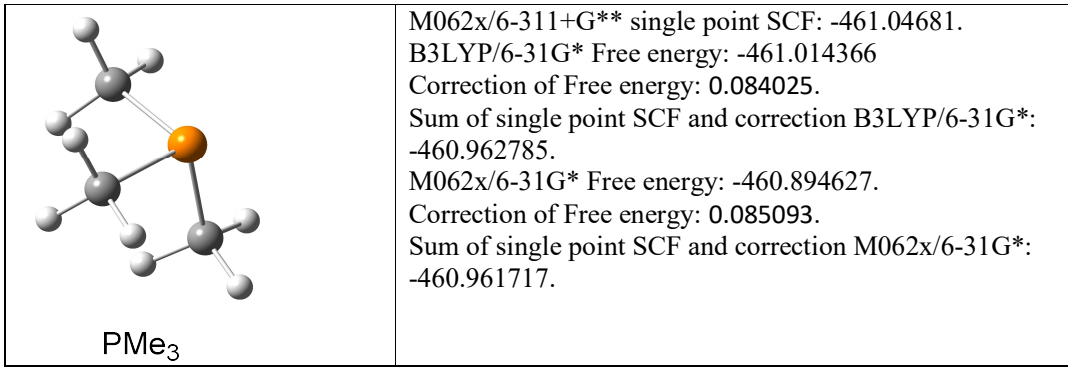

0 1

|   |             |             |             |
|---|-------------|-------------|-------------|
| P | -0.00015700 | -0.00010000 | -0.61585900 |
| C | 1.41707100  | -0.79393300 | 0.28433000  |
| C | -1.39599800 | -0.82997000 | 0.28448300  |
| C | -0.02082300 | 1.62403700  | 0.28432600  |
| H | 1.49189400  | -1.84712500 | -0.00150700 |
| H | 1.29963800  | -0.73100200 | 1.37210400  |
| H | 2.35343800  | -0.30388400 | 0.00226900  |
| H | -1.28193000 | -0.76140800 | 1.37227400  |
| H | -1.44172900 | -1.88546700 | 0.00104200  |
| H | -2.34527700 | -0.36689300 | -0.00001100 |
| H | 0.85685700  | 2.21280900  | 0.00232800  |
| H | -0.02164900 | 1.49089100  | 1.37211000  |
| H | -0.91039400 | 2.19277500  | -0.00156200 |

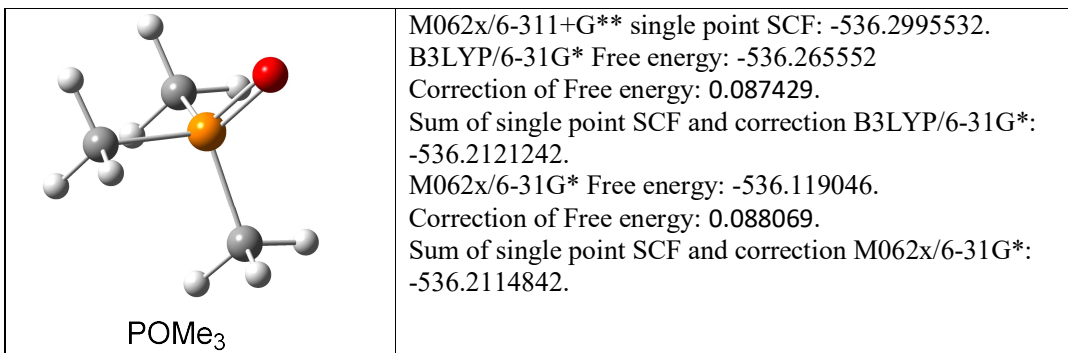

O 1

|   |             |             |             |
|---|-------------|-------------|-------------|
| P | -0.00014400 | 0.00035500  | 0.19222800  |
| C | 0.39278400  | -1.61328900 | -0.55761800 |
| C | 1.20074600  | 1.14546000  | -0.56069100 |
| C | -1.59343700 | 0.46552200  | -0.55987900 |
| O | 0.00005200  | 0.00224400  | 1.68544100  |
| H | 1.38237600  | -1.93291200 | -0.22065400 |
| H | 0.38162100  | -1.56494900 | -1.65047100 |
| H | -0.33941300 | -2.35229600 | -0.22188700 |
| H | 1.16452000  | 1.10918200  | -1.65346100 |
| H | 2.20653200  | 0.88088400  | -0.22392100 |
| H | 0.98346900  | 2.16316200  | -0.22602200 |
| H | -2.36499800 | -0.23253700 | -0.22465000 |
| H | -1.54412400 | 0.45132500  | -1.65266200 |
| H | -1.86879800 | 1.46869800  | -0.22408700 |
